1 **The bundle sheath of rice is conditioned to play an active role in water transport as**  
2 **well as sulfur assimilation and jasmonic acid synthesis**

3

4

5

6 Lei Hua<sup>1</sup>, Sean R. Stevenson<sup>1</sup>, Ivan Reyna-Llorens<sup>1</sup>, Haiyan Xiong<sup>1</sup>, Stanislav Kopriva<sup>2</sup> and  
7 Julian M. Hibberd<sup>1</sup>

8

9 <sup>1</sup>Department of Plant Sciences, University of Cambridge, Downing Street, Cambridge CB2  
10 3EA, United Kingdom

11 <sup>2</sup>Institute for Plant Sciences, Cluster of Excellence on Plant Sciences (CEPLAS), University  
12 of Cologne, Zùlpicher Str. 47b, 50674 Cologne, Germany

13

14

15

16

17

18

19 Email addresses:

20 LH - lh556@cam.ac.uk

21 SRS - srs62@cam.ac.uk

22 IRL - suallorems@gmail.com

23 HX - hx253@cam.ac.uk

24 SK - skopriva@uni-koeln.de

25 JMH - jmh65@cam.ac.uk

26

27

28 Running title: Gene expression in the rice bundle sheath

29 Keywords: *Oryza sativa*; Bundle Sheath; Water Transport; Sulphur Metabolism; Deep  
30 sequencing; Laser Capture Microdissection

31 **Abstract**

32 Leaves comprise multiple cell types but our knowledge of the patterns of gene expression  
33 that underpin their functional specialization is fragmentary. Our understanding and ability to  
34 undertake rational redesign of these cells is therefore limited. We aimed to identify genes  
35 associated with the incompletely understood bundle sheath of C<sub>3</sub> plants, which represents  
36 a key target associated with engineering traits such as C<sub>4</sub> photosynthesis into rice. To better  
37 understand veins, bundle sheath and mesophyll cells of rice we used laser capture  
38 microdissection followed by deep sequencing. Gene expression of the mesophyll is  
39 conditioned to allow coenzyme metabolism and redox homeostasis as well as  
40 photosynthesis. In contrast, the bundle sheath is specialized in water transport, sulphur  
41 assimilation and jasmonic acid biosynthesis. Despite the small chloroplast compartment of  
42 bundle sheath cells, substantial photosynthesis gene expression was detected. These  
43 patterns of gene expression were not associated with presence/absence of particular  
44 transcription factors in each cell type, but rather gradients in expression across the leaf.  
45 Comparative analysis with C<sub>3</sub> *Arabidopsis* identified a small gene-set preferentially  
46 expressed in bundle sheath cells of both species. This included genes encoding  
47 transcription factors from fourteen orthogroups, and proteins allowing water transport,  
48 sulphate assimilation and jasmonic acid synthesis. The most parsimonious explanation for  
49 our findings is that bundle sheath cells from the last common ancestor of rice and  
50 *Arabidopsis* was specialized in this manner, and since the species diverged these patterns  
51 of gene expression have been maintained.

52

53

54

55 **Significance statement:** The role of bundle sheath cells in C<sub>4</sub> species have been studied  
56 intensively but this is not the case in leaves that use the ancestral C<sub>3</sub> pathway. Here, we  
57 show that gene expression in the bundle sheath of rice is specialized to allow sulphate and  
58 nitrate reduction, water transport and jasmonate synthesis, and comparative analysis with  
59 *Arabidopsis* indicates ancient roles for bundle sheath cells in water transport, sulphur and  
60 jasmonate synthesis.

## 61 Introduction

62 Although the major cell types of a leaf were described in the 19th century (Haberlandt,  
63 1884) we have an incomplete understanding of the role that each plays (Aubry et al., 2014b;  
64 Mustroph et al., 2009). This lack of knowledge hinders our understanding of how basic  
65 processes are organized but is also likely to limit the rational re-design of leaves for crop  
66 improvement. One example is associated with attempts to engineer C<sub>4</sub> photosynthesis into  
67 species such as C<sub>3</sub> rice to increase yields (von Caemmerer et al., 2012; Hibberd et al., 2008;  
68 Langdale, 2011). As C<sub>4</sub> photosynthesis typically requires metabolic compartmentation  
69 between mesophyll and bundle sheath cells, a better understanding of these tissues in rice  
70 may facilitate such a project.

71 The C<sub>4</sub> pathway is thought to have evolved over 60 times independently in  
72 monocotyledons and dicotyledons in response to reduced water availability and CO<sub>2</sub> supply  
73 (Sage, 2004). These environmental factors reduce the ratio of carboxylation to oxygenation  
74 events at the active site of RuBisCO, and so lead to higher rates of the photorespiration  
75 (Tipple and Pagani, 2007; Sage et al., 2012). Whilst in some C<sub>4</sub> species, a carbon  
76 concentrating mechanism is established within large cells (Jurić et al., 2016; von  
77 Caemmerer et al., 2014; Voznesenskaya et al., 2001) in the majority of known lineages this  
78 takes place across distinct cell-types. In these two-celled C<sub>4</sub> species, RuBisCO activity is  
79 replaced with phosphoenolpyruvate carboxylase in mesophyll cells to allow bicarbonate to  
80 be fixed into oxaloacetate. High concentrations of C<sub>4</sub> acids derived from oxaloacetate build  
81 up in mesophyll cells and drive diffusion to the bundle sheath where C<sub>4</sub> acid decarboxylases  
82 resupply CO<sub>2</sub> to RuBisCO. This reorganization of photosynthesis is thus enabled by the  
83 presence of distinct cell types such as the mesophyll and bundle sheath (Furbank, 2016).  
84 Not only do bundle sheath cells of C<sub>4</sub> plants undertake a key role in photosynthesis, but they  
85 are also the primary location of starch synthesis (Lunn and Furbank, 1997) and sulphur  
86 metabolism (Gerwick et al., 1980; Passera and Ghisi, 1982; Schmutz and Brunold, 1984;  
87 Burnell, 1984; Burgener et al., 1998). Distinct classes of bundle sheath cells have been  
88 reported in maize, with abaxial bundle sheath cells of rank-2 intermediate being specialised  
89 for phloem loading (Bezruczyk et al., 2021). The importance of bundle sheath cells in the  
90 C<sub>4</sub> leaf, and the discovery that their thickened cell walls allow them to be separated from the

91 rest of the leaf led to them being studied intensively. In summary, in the C<sub>4</sub> leaf bundle sheath  
92 cells are well characterized and carry out a variety of specialized roles.

93 Although the vast majority of plants use the ancestral C<sub>3</sub> pathway, our understanding of  
94 gene expression in bundle sheath cells specifically, and other major cell types more  
95 generally of C<sub>3</sub> leaves is poor. In *Arabidopsis thaliana* (hereafter *Arabidopsis*) the bundle  
96 sheath represents approximately 15% of chloroplast-containing cells in the leaf (Kinsman  
97 and Pyke, 1998). Whilst the photosynthetic apparatus is functional in C<sub>3</sub> bundle sheath cells  
98 (Fryer et al., 2002; Williams et al., 1989), the absolute number of chloroplasts per cell is low.  
99 Consistent with this, reducing chlorophyll accumulation or increasing the chloroplast  
100 compartment in these cells have limited impact on leaf level photosynthesis (Janacek et al.,  
101 2009; Wang et al., 2017). Instead, it appears that the bundle sheath of *Arabidopsis* is  
102 specialized in sulphur metabolism and glucosinolate synthesis (Aubry et al., 2014b;  
103 Koroleva et al., 2010). Stress responsive regulation of aquaporins in bundle-sheath cells are  
104 considered important for hydraulic conductance of the whole leaf (Sade et al., 2014; Shatil-  
105 Cohen et al., 2011; Attia et al., 2020) and consistent with this, bundle sheath cells have been  
106 proposed to help maintain hydraulic integrity of the xylem (Griffiths et al., 2013; Sage, 2001)  
107 as well as regulate flux of mineral and metabolites in and out of the leaf (Leegood, 2008;  
108 Wigoda et al., 2017). In summary, compared with C<sub>4</sub> plants we have a relatively poor  
109 understanding of the role of bundle sheath cells in C<sub>3</sub> species, and this is particularly the  
110 case in grasses such as rice.

111 In roots, one approach that has been used widely to define the function of discrete cell  
112 types is to generate lines in which distinct tissues are marked with a fluorescent protein, and  
113 after protoplast isolation and cell sorting, the patterns of gene expression defined (Birnbaum  
114 et al., 2003; Brady et al., 2007). In leaves, this approach has been less widely adopted, likely  
115 due to the longer incubation times typically required to generate protoplasts, and concerns  
116 about stress and de-differentiation taking place during protoplasting (Sawers et al., 2007).  
117 Recently, rapid protoplasting followed by isolation of bundle sheath cells indicated a key role  
118 in transport (Wigoda et al., 2017), single cell RNA sequencing allowed distinct patterns of  
119 gene expression to be related to discrete cell types of the *Arabidopsis* leaf, and indicated  
120 that bundle sheath protoplasts were most similar to xylem cells (Kim et al., 2021).



121 Alternate technologies that have been applied to this problem include the isolation of  
122 ribosomes from specific cell types after they were labelled with an exogenous tag (Aubry et  
123 al., 2014b; Mustroph et al., 2009), or the use of laser capture microdissection (Jiao et al.,  
124 2009). This latter approach circumvents the need to identify promoters with highly specific  
125 expression domains and the production of transgenic lines.

126 Here we used an optimised laser capture microdissection protocol for RNA isolation from  
127 leaves (Hua and Hibberd 2019) to study the patterns of gene expression in bundle sheath,  
128 veinal (including phloem and xylem parenchyma, xylem, as well as sieve elements and  
129 companion cells), and mesophyll cells of rice. We had three main hypotheses. First, that as  
130 the rice bundle sheath contains a small chloroplast compartment, gene expression would  
131 be poorly set up for photosynthesis. Second, as in other species, gene expression in the  
132 rice bundle sheath would favour water transport. Third, in contrast to Arabidopsis, as rice  
133 does not make glucosinolates there has been no selection pressure to restrict sulphur  
134 assimilation to the bundle sheath. Mesophyll and bundle sheath cells were distinguished by  
135 over-representation of terms including photosynthesis and co-enzyme metabolism in the  
136 former, and solute transport and protein synthesis in the latter. Transcripts encoding the  
137 majority of aquaporins were more abundant in bundle sheath cells, and this was also the  
138 case for transcripts encoding proteins associated with sulphur assimilation and nitrate  
139 reduction. Transcription factors that were preferential to each cell type were identified, but  
140 in most cases a gradient from veins to bundle sheath to mesophyll cells, or *vice versa*, was  
141 detected. Direct comparison to publicly available data from Arabidopsis identified groups of  
142 genes encoding aquaporins, proteins allowing sulphur assimilation, jasmonic acid synthesis  
143 and also a small number of transcription factor families that showed preferential expression  
144 in the bundle sheath of both species. Whilst these findings could be due to evolutionary  
145 convergence, the most parsimonious explanation is that the bundle sheath of the last  
146 common ancestor of monocotyledons and dicotyledons was specialised in water transport,  
147 sulphur assimilation as well as jasmonic acid synthesis, and that members of the Basic  
148 Leucine Zipper, C<sub>2</sub>H<sub>2</sub>-type Zinc Finger, DNA-binding with One Finger, Ethylene Responsive  
149 Factor, Hairy-Related Transcription-Factor, GRAS, MYB, Nuclear Factor-YB and Vascular  
150 Plant One-Zinc Finger Protein transcription factor families play ancient and conserved roles  
151 in this cell type.

## 152 **Results**

### 153 **The rice bundle sheath is specialized for transport but also photosynthesis**

154 To gain insight into the genetic basis for functional specialization associated with  
155 mesophyll, bundle sheath and veinal cells of rice, laser capture microdissection was used  
156 to isolate RNA from these tissues. Paradermal sections allowed the unambiguous  
157 identification of mesophyll cells (Figure 1A), bundle sheath cells containing large vacuoles  
158 and fewer chloroplasts (Figure 1C) and veins (Figure 1E). To isolate each cell-type with  
159 minimal cross contamination, mesophyll cells were first dissected and captured (Figure 1A,  
160 1B). Sequential capture of bundle sheath cells (Figure 1C, 1D) followed by veinal cells was  
161 then possible (Figure 1E, 1F). RNA was extracted from each tissue and RNA Integrity  
162 Numbers (RIN) ranging from 6.0-7.3 indicated good quality. Strong peaks associated with  
163 ribosomal RNAs of the chloroplast were evident in mesophyll cells (Figure 1G), whereas in  
164 bundle sheath cells they were less abundant (Figure 1H) and in veins they were not  
165 discernable (Figure 1I).

166 Three prime mRNA sequencing was performed and from each cell type, 24-36 million  
167 reads from four or five biological replicates obtained. After processing to remove low quality  
168 reads 13-23 million were quantified against the rice cDNA reference (MSU v7)  
169 (Supplemental Table 1). An average of 10,097, 10,083 and 13,648 transcripts were detected  
170 in each cell type (Supplemental Table 1). Spearman ranked correlation coefficients for gene  
171 expression showed little variation between replicates from each cell type, and that each cell  
172 type exhibited distinct patterns of gene expression (Figure 1J). Principle components  
173 analysis also showed close grouping of biological replicates, and that 46.1% of variance was  
174 associated with the three cell types whilst that a second component separated the bundle  
175 sheath from mesophyll and veins (Figure 1K). To assess the purity of the tissues sampled,  
176 we examined transcript abundance of genes previously reported to be associated with each  
177 cell type. Consistent with these studies, *SUCROSE PHOSPHATE SYNTHASE (SPS1,*  
178 *LOC\_Os01g69030)* and aquaporin *PIP2;7 (LOC\_Os09g36930)* were preferentially  
179 expressed in mesophyll cells (Chávez-Bárcenas et al., 2000; Li et al., 2008), transcripts  
180 derived from two Tonoplast Monosaccharide Transporters *TMT1* and *TMT2* were detected  
181 in mesophyll, bundle sheath cells and vascular bundles (Cho et al., 2010),  
182 *PHOSPHOENOLPYRUVATE CARBOXYKINASE (PCK1)* was expressed most strongly in

183 bundle sheath and veins (Nomura et al., 2005), and the Sucrose Transporter *SUT1*  
184 (LOC\_Os03g07480) (Ibraheem et al., 2013; Scofield et al., 2007) was predominately  
185 expressed in vascular tissue (Supplemental Figure 1). The strong clustering of each cell-  
186 type combined with congruence to previous studies are consistent with the notion that these  
187 samples obtained by laser capture microdissection contained relatively little cross-  
188 contamination.

189 To quantify the extent to which transcript abundance differed between bundle sheath,  
190 mesophyll and veinal cells, we performed differential gene expression analysis using  
191 DESeq2 and edgeR (Love et al., 2014; Robinson et al., 2010). This identified 1,919  
192 differentially expressed genes between bundle sheath and mesophyll cells, the majority of  
193 which (1,173) were more abundant in bundle sheath cells (FDR and adjusted  $P < 5\%$ )  
194 (Supplemental Table 2). Functional enrichment analysis identified three categories over-  
195 represented in mesophyll cells containing transcripts linked to photosynthesis, coenzyme  
196 metabolism and redox homeostasis (Figure 1L). Eight categories were associated with  
197 bundle sheath cells, including solute transport, protein biosynthesis, phytohormone action,  
198 nutrient uptake, polyamine metabolism and cellular respiration (Figure 1L). To provide an  
199 overview of metabolic specialization in mesophyll and bundle sheath cells, Mapman (Thimm  
200 et al., 2004; Schwacke et al., 2019) was used. Consistent with mesophyll cells being  
201 specialized for photosynthesis, this indicated that transcripts encoding components of the  
202 light reactions, Calvin Benson Bassham cycle and tetrapyrrole biosynthesis were  
203 upregulated in mesophyll cells, whilst those associated with many other metabolic  
204 processes including cell wall, minor carbohydrate, fatty acid, amino acid and secondary  
205 metabolism were more abundant in the bundle sheath (Figure 1M). Quantitative comparison  
206 of bundle sheath and veinal cells showed 1,258 and 660 genes were significantly up and  
207 down regulated in bundle sheath cells respectively (Supplemental Table 2) and indicated  
208 categories associated with the bundle sheath included photosynthesis, carbohydrate  
209 metabolism, redox homeostasis, secondary metabolism and solute transport (Supplemental  
210 Figure 2A). Mapman outputs confirmed transcripts encoding components of the light-  
211 dependent reactions of photosynthesis, as well as the Calvin-Benson-Bassham cycle and  
212 photorespiratory pathway were more abundant in bundle sheath than veinal cells  
213 (Supplemental Figure 2B). In contrast, transcripts preferential to veins were associated with

214 processes that included RNA biosynthesis, protein homeostasis, lipid metabolism and solute  
215 transport (Supplemental Figure 2A). When mesophyll and veins were compared, a greater  
216 number of differentially expressed genes were identified with 1,728 and 2,038 transcripts  
217 being more abundant in mesophyll and veins respectively (Supplemental Table 2). The  
218 expected preferential expression of photosynthesis-related genes in mesophyll cells was  
219 detected, and transcripts associated with protein biosynthesis and cellular respiration were  
220 more abundant in veins (Supplemental Figure 2C&D). The greater number of differentially  
221 expressed genes between mesophyll and veins is consistent with the correlation and PCA  
222 analysis (Figure 1J&K).

223 To further assess patterns of transcript abundance across all three cell types we clustered  
224 genes based on expression. 4155 genes defined as being differentially expressed in the  
225 pairwise comparisons above were partitioned into six clusters associated with the cell types  
226 in which they were preferentially expressed (Figure 1N). Veins ( $C_V$ ) had the largest (972)  
227 whilst bundle sheath cells ( $C_{BS}$ ) had the fewest (285) number of preferentially expressed  
228 genes. Functional enrichment analysis showed that genes in the mesophyll ( $C_M$ ) were over-  
229 represented in photosynthesis, coenzyme metabolism and solute transport, whilst  $C_{BS}$  were  
230 enriched in solute transport, enzyme classification, amino acid metabolism and polyamine  
231 metabolism (Figure 1O). Genes in  $C_V$  were involved in cellular respiration, polyamine  
232 metabolism, carbohydrate metabolism and phytohormone action (Figure 1O).  $C_{BS\&M}$   
233 contained genes highly expressed in both mesophyll and bundle sheath, and was over-  
234 represented in processes including photosynthesis, coenzyme metabolism, carbohydrate  
235 metabolism, redox homeostasis, secondary metabolism (Figure 1O).  $C_{BS\&V}$  contained genes  
236 associated with protein biosynthesis, cellular respiration, and solute transport (Figure 1O).  
237 No enriched categories were associated with both the mesophyll and vein cells ( $C_{M\&V}$ ).  
238 Consistent with their distinct function, vein and mesophyll clusters showed low overlap, but  
239 the most abundant transcripts in bundle sheath cells were also either expressed in veins or  
240 mesophyll cells. Overall, and associated with their morphology, the data reveal a gradient in  
241 photosynthesis-related transcripts from low in veins to high in mesophyll cells.

242

243 **Patterning of gene expression in the rice bundle sheath conditions the cells for water**  
244 **transport**

245 To understand the gene classes responsible for enrichment of the transport term in the  
246 bundle sheath, we examined expression of major transporter families in each of the six  
247 clusters. The family most enriched in  $C_{BS}$  was the major intrinsic protein (MIP) group, but  
248 multiple genes belonging to the cation diffusion facilitators (CDF) superfamily, major  
249 facilitator superfamily (MFS), ion transporter (IT) superfamily, multidrug/oligosaccharidyl-  
250 lipid/polysaccharide (MOP) flippase superfamily and amino acid-polyamine-organocation  
251 (APC) superfamily were also present (Supplemental Figure 3A).

252 The MIP group contains genes encoding water channels (aquaporins) including plasma  
253 membrane intrinsic proteins (PIPs), tonoplast intrinsic proteins (TIPs) (Sakurai et al., 2005).  
254 Transcripts encoding three and two members of the PIP1 and PIP2 families respectively  
255 accumulated preferentially in the bundle sheath compared with mesophyll and veinal cells  
256 (Figure 2A). Consistent with the deep sequencing data, *in situ* RNA localization of *PIP1.1*  
257 and *PIP1.3* generated strong signal associated with the periphery of bundle sheath cells  
258 (Figure 2B). Transcripts encoding three tonoplast intrinsic proteins (*TIP1.1*, *TIP1.2* and  
259 *TIP2.2*) also accumulated preferentially in bundle sheath cells (Figure 2A), presumably  
260 allowing water storage in the large vacuole. Lastly, in addition to these transporters, specific  
261 P-type and V-type ATPases that could regulate leaf hydraulic conductance (Grunwald et al.,  
262 2021) and establish a proton gradient across plasma and vacuole membranes to power  
263 secondary transport were strongly expressed in bundle sheath cells (Supplemental Figure  
264 3B). Taken together, this preferential patterning of multiple aquaporins to the rice bundle  
265 sheath suggests an important role for these cells associated with water transport and  
266 storage.

267

### 268 **The rice bundle sheath preferentially accumulates transcripts associated with** 269 **sulphur and nitrogen assimilation**

270 Sulphur is an essential element required for both central metabolism and responding to  
271 biotic and abiotic stress. Although primarily taken up as sulphate by roots, reduction mainly  
272 takes place in leaves (Figure 2C). Prior to activation by ATP sulfurylase (ATPS) to adenosine  
273 5'-phosphosulfate (APS), transport into the cell is mediated by SULTR transporters. APS is  
274 reduced into sulfite and sulfide by APS reductase (APR) and sulfite reductase (SIR)  
275 respectively, and then incorporated into O-acetylserine via O-acetylserine (thiol)lyase

276 (OASTL) to generate the amino acid cysteine. Notably, transcripts derived from two highly  
277 expressed *SULTR* transporters (*SULTR2;1*, *SULTR3;2*), both *ATPS* genes, *APR*, as well as  
278 *SIR* and *OASTL1* were more abundant in bundle sheath cells compared with the mesophyll  
279 (Figure 2C). With the exception of transcripts encoding *APR* and *OASTL1* that were most  
280 abundant in bundle sheath cells, most were even more highly expressed in veins (Figure  
281 2C). RNA *in situ* hybridization for transcripts encoding *ATPS* and *SIR* showed stronger  
282 signals in bundle sheath and veins compared with mesophyll cells (Figure 2D). These results  
283 strongly imply that gene expression of the rice bundle sheath cells is conditioned to allow  
284 sulphur assimilation.

285 The data also indicate that gene expression in the bundle sheath is conditioned for  
286 synthesis of glutathione, a major sulphur-containing metabolite that plays critical roles in  
287 redox homeostasis and heavy metal(loid) detoxification. Biosynthesis of glutathione is  
288 catalyzed by  $\gamma$ -glutamylcysteine synthetase (ECS) to generate  $\gamma$ -glutamylcysteine ( $\gamma$ -EC)  
289 from glutamate and cysteine, followed by ligation of glycine and  $\gamma$ -EC by glutathione  
290 synthetase (Foyer and Noctor, 2011; Hernández et al., 2015). The intermediate  $\gamma$ -EC has to  
291 be exported from the plastid by the CRT-like transporter (CLT) (Maughan et al., 2010;  
292 Hernández et al., 2015; Yang et al., 2016) to sustain GSH biosynthesis in the cytosol  
293 (Pasternak et al., 2007). Interestingly, we found that transcripts encoding *ECS1* were  
294 preferentially expressed in bundle sheath and veinal cells (Figure 2C), and that  $\gamma$ -  
295 glutamylcysteine transporter *CLT1* accumulated preferentially in bundle sheath cells (Figure  
296 2C). Rice absorbs both arsenate and arsenite by different transporters, but arsenate needs  
297 to be reduced into arsenite before it can be detoxified by phytochelatin. *CLT1* has been  
298 reported to be critical for rice tolerance to arsenic because it determines phytochelatin  
299 biosynthesis and arsenate reduction (Yang et al., 2016). Notably, the arsenate reductase  
300 *HAC1;1* also showed preferential expression in the bundle sheath, suggesting that this cell  
301 type may play an important role in arsenate reduction and detoxification (Figure 2E).

302 As with sulphur assimilation, transcripts encoding some of the pathway allowing nitrate  
303 reduction were more highly expressed in the bundle sheath and veinal cells compared with  
304 mesophyll cells. Interestingly, this included the nitrate transporters *NRT1.4*, *NRT1.1A*,  
305 *NRT1.2*, and *NRT2.3*, both nitrate reductases (*NIA1* and *NIA2*), nitrite reductase (*NIR*) and  
306 glutamine synthetase (*GS1.1*). Transcripts encoding *NRT2.3*, *NIA1* and *NIA2* were most



307 abundant in bundle sheath cells, while the rest were also highly expressed in veins. In  
308 contrast, transcripts encoding glutamine synthetase (*GS2*) and glutamate synthase (*Fd-*  
309 *GOGAT*) that allow ammonia assimilation in the chloroplast were preferentially expressed in  
310 the bundle sheath and mesophyll relative to veinal cells (Figure 2F, Supplemental Figure 4).  
311 These results indicate that gene expression in the rice bundle sheath is also tuned to  
312 specialise in nitrate assimilation and amino acid biosynthesis.

313

### 314 **The Calvin Benson Bassham cycle, photorespiration and C<sub>4</sub> cycle gene expression**

315 Compared with the mesophyll, bundle sheath cells contain few chloroplasts, and veins  
316 only contain rudimentary plastids (Figure 3A). Consistent with this, transcripts encoding  
317 most components of photosynthetic electron transport chain were abundant in mesophyll  
318 cells, and whilst barely detectable in veins they were clearly expressed in the bundle sheath  
319 (Supplemental Figure 5A). Exceptions included one ferredoxin that showed highest  
320 transcript abundance in bundle sheath cells, three ferredoxin genes for which transcripts  
321 were more abundant in bundle sheath and vein cells compared with the mesophyll, and  
322 three homologs of photosystem I subunit PsaA, photosystem II subunit PsbK, and  
323 (Supplemental Figure 5A, 5B). In contrast to the primary ferredoxin Fd1 (LOC\_Os08g01380)  
324 involved in photosynthetic electron transport (He et al., 2020) and primarily expressed in  
325 mesophyll cells, four other ferredoxins including the nitrate-inducible Fd (LOC\_Os05g37140)  
326 (Doyama et al., 1998) were preferentially expressed in in bundle sheath and veins indicating  
327 that rice bundle sheath cells have optimised reducing power for nitrate reduction, as well as  
328 sulphur assimilation. A gradient from high expression in mesophyll to low in veins was  
329 observed for most enzymes of the Calvin Benson Bassham cycle. Exceptions included  
330 *RUBISCO ACTIVASE (RCA)*, which was poorly expressed in both bundle sheath and veinal  
331 cells, and *RBCS4* which had similar transcript abundance in bundle sheath and mesophyll  
332 cells (Figure 3B, Supplemental Figure 5C). The ratio of *RCA* to *RbcS* transcripts was twofold  
333 higher in mesophyll compared with bundle sheath cells. With the exception of ADP-glucose  
334 pyrophosphorylase subunits (*APL1*, *APS2*), starch synthase (*SSI*) and granule-bound starch  
335 synthase (*GBSSII*) which were more abundant in mesophyll cells, transcripts encoding  
336 enzymes of starch synthesis were similar in mesophyll and bundle sheath cells  
337 (Supplemental Figure 5D). Although transcripts associated the glucose 6-



338 phosphate/phosphate translocator (GPT1, GPT2-1) were more abundant in bundle sheath  
339 than mesophyll cells, their abundance was low compared with the triose  
340 phosphate/phosphate translocator (TPT1) (Supplemental Figure 5D). Together, these data  
341 indicate that gene expression in the bundle sheath is set up to favour starch synthesis using  
342 products of the Calvin Benson Bassham cycle.

343 Most transcripts encoding proteins of photorespiration showed strong expression in the  
344 mesophyll, weaker expression in the bundle sheath and very poor expression in veins  
345 (Figure 3C, Supplemental Figure 5E). The only exceptions were genes with very low  
346 absolute levels of expression that were preferential to veins, and which included one L-  
347 *GLYCINE DECARBOXYLASE* subunit (*GDCL2*), one *SERINE*  
348 *HYDROXYMETHYLTRANSFERASES* (*SHMT4*), one *PHOSPHOGLYCOLATE*  
349 *PHOSPHATASE* (*PGP2*) and two *GLYCINE DECARBOXYLASE COMPLEX H* subunits  
350 (*GDCH2&3*) (Figure 3C, Supplemental Figure 5E).

351 It has previously been reported that vascular tissue of C<sub>3</sub> plants possesses high activities  
352 of some enzymes associated with C<sub>4</sub> photosynthesis, including all three C<sub>4</sub> acid  
353 decarboxylases and pyruvate, orthophosphate dikinase (Hibberd and Quick, 2002; Brown et  
354 al., 2010; Shen et al., 2016). However, to our knowledge it has not been possible to delimit  
355 these activities to the specific cells associated with the vascular tissue. To investigate this,  
356 we assessed abundance of transcripts encoding core enzymes of the C<sub>4</sub> cycle in veins,  
357 bundle sheath and mesophyll cells of rice (Figure 3D). Transcripts of *CARBONIC*  
358 *ANHYDRASE* (*CA*) were more abundant in the mesophyll compared with bundle sheath and  
359 vein cells, a pattern consistent with that required for C<sub>4</sub> photosynthesis. Transcripts encoding  
360 PEP carboxylase (*PEPC*), NADP-MALIC DEHYDROGENASE (*NADP-MDH*), ASPARTATE  
361 AMINOTRANSFERASE (*AspAT*), NAD-MALIC ENZYME (*NAD-ME*), ALANINE  
362 AMINOTRANSFERASE (*AlaAT*), PYRUVATE, ORTHOPHOSPHATE DIKINASE (*PPDK*)  
363 and the *PPDK REGULATORY PROTEIN* (*PPDK-RP*) showed no significant difference in  
364 abundance between mesophyll and bundle sheath cells. However, transcripts encoding  
365 *AMP KINASE* (*AMK*) and *PYROPHOSPHORYLASE* (*PPASE*), which allow the *PPDK*  
366 reaction and *APS* synthesis by *ATP sulfurylase* to proceed, showed higher abundance in the  
367 bundle sheath than both veins and mesophyll cells (Figure 3D), suggesting that the activity  
368 of *PPDK* might be higher in this cell type. Notably, two C<sub>4</sub> acid decarboxylases *NADP-*

369 *DEPENDENT MALIC ENZYME (NADP-ME)* and *PHOSPHOENOLPYRUVATE*  
370 *CARBOXYKINASE (PCK)* showed a gradient in transcript abundance from veins, to bundle  
371 sheath to mesophyll cells. These data indicate that high activity of these C<sub>4</sub> decarboxylases  
372 in vascular bundles of rice (Shen et al., 2016) is likely caused by their expression in the vein  
373 rather than bundle sheath cells. Overall, C<sub>4</sub> genes could be partitioned into three main  
374 groups, either showing a strong negative gradient (*CA* and *PEPC*) from mesophyll to vein  
375 cells, a strong positive gradient (*NADP-ME*, *NAD-ME*, *PCK* and *AlaAT*) or a tendency to be  
376 most strongly expressed in the bundle sheath (*NADP-MDH*, *AspAT*, *PPDK*, *PPDK-RP*, *AMP*  
377 and *PPase*) (Figure 3D). This finding is consistent with them being part of multiple gene  
378 regulatory networks in the ancestral C<sub>3</sub> state that pattern their expression across these cell  
379 types.

380

### 381 **Transcription factors and their cognate *cis*-elements associated with the rice** 382 **mesophyll, bundle sheath and vein**

383 To gain insight into the regulatory architecture associated with the three cell types, we  
384 identified transcription factors in each of the six clusters and designated these as TF<sub>M</sub>, TF<sub>BS</sub>,  
385 TF<sub>V</sub>, TF<sub>BS&M</sub>, TF<sub>BS&V</sub> and TF<sub>M&V</sub>. From a total of 201 differentially expressed transcription  
386 factors, over 30% of them (66) showed vein-specific expression (TF<sub>V</sub>, Figure 4A), including  
387 families such as bZIP, bHLH, G2-like, MYB-related and Dof (Supplemental Figure 6A). ERF,  
388 HD-ZIP and MYB-related were the most abundant transcription factor families in mesophyll-  
389 specific cluster TF<sub>M</sub> (Figure 4A, Supplemental Figure 6A). Transcription factors known to  
390 regulate chloroplast biogenesis and photosynthesis were most abundant in mesophyll cells,  
391 but also detected in the bundle sheath. This included GNC (LOC\_Os06g37450) in TF<sub>M</sub>, and  
392 GLK1 (LOC\_Os06g24070), GLK2 (LOC\_Os01g13740) and CGA1 (LOC\_Os02g12790) in  
393 TF<sub>BS&M</sub>. Thus, consistent with the chloroplast complement of each cell type (Figure 3A),  
394 these transcription factors found in TF<sub>BS&M</sub> were less abundant in bundle sheath compared  
395 with mesophyll cells (Supplemental Figure 6C).

396 The bundle sheath specific cluster contained only ten genes that derived from families  
397 such as the ERFs, bZIPs and bHLHs (Figure 4A, Supplemental Figure 6A). Transcription  
398 factors abundant in both bundle sheath and vein belonged to the MYB, ERF, bZIP and  
399 WRKY families, whilst CO-like, C<sub>2</sub>H<sub>2</sub>, and G2-like families were abundant in the mesophyll

400 and bundle sheath cluster (Figure 4A, Supplemental Figure 6A). The ZF-HD, G2-like, DBB,  
401 MIKC-MADS, and Dof families were significantly enriched in the vein-specific cluster, CO-  
402 like transcription factors were over-represented in TF<sub>BS&M</sub>, and Dof, MYB, HRT-like and VOZ  
403 transcription factors were over-represented in TF<sub>BS&V</sub> (Supplemental Figure 6B).

404 To determine whether DNA motifs known to be bound by transcription factors were  
405 associated with genes preferential to each cell type, we performed motif enrichment  
406 analyses using the FIMO and AME tools (Bailey et al., 2015). Although the two approaches  
407 differ in their statistical testing they returned broadly similar estimates for the number of  
408 enriched motifs. AME found the highest number of motifs in C<sub>BS</sub> and C<sub>BS&M</sub> (n=44 and 91  
409 respectively), whilst FIMO identified the most enriched motifs in C<sub>V</sub> and C<sub>BS&M</sub> (n=86 and  
410 100 respectively) (Supplemental table 4 and 5). Both found either few, or no enriched motifs  
411 in the C<sub>BS&V</sub> (AME=11; FIMO=5), C<sub>M</sub> (AME=0; FIMO=3) or C<sub>M&V</sub> (both 0) clusters  
412 (Supplemental table 4) suggesting that genes making up these three clusters are  
413 heterogeneously regulated.

414 As many DNA motifs share considerable sequence similarity, and closely related  
415 transcription factors can bind to similar motifs, we collapsed known DNA binding motifs from  
416 closely related transcription factors into forty-one groups (Figure 4B). Twenty-three of these  
417 groups were enriched or depleted in a specific cluster associated with transcript abundance  
418 in the three cell types. Although many were found in multiple clusters, there were no  
419 examples where a particular motif was statistically enriched or depleted in all six clusters  
420 (Figure 4B). C<sub>M</sub> contained the fewest enriched motifs (n=4), only one of which (ARF2) was  
421 uniquely enriched in this cluster (Figure 4B). HD-Zip I and LHY motifs were unique to C<sub>BS</sub>,  
422 but all other enriched motifs in the bundle sheath were also found in C<sub>V</sub> suggesting overlap  
423 in the regulation of gene expression between bundle sheath and vein cells (Figure 4B). C<sub>V</sub>  
424 contained the most enriched motifs (n=29) of which almost half of these were unique to this  
425 cluster and included BIRD, Dof, GATA, HD-Zip II, PLT, FAR1 and FHY3 motifs (Figure 4B).

426 We next investigated whether transcription factors and their cognate DNA binding sites  
427 were associated with the six clusters that had been defined by patterns of gene expression  
428 across mesophyll, bundle sheath and veinal cells. As relatively few transcription factors from  
429 rice have had their DNA binding characteristics determined, we first used protein homology  
430 (BLASTP bit-score > 100) to link them with transcription factors for which DNA binding data

431 are available. Of the mesophyll specific transcription factors, although five are likely to bind  
432 motifs enriched in the cistrome of bundle sheath and mesophyll cells (Figure 4C), none were  
433 associated with motifs enriched only in the mesophyll cistrome. In contrast, three bundle  
434 sheath specific transcription factors coincided with motifs enriched in the BS-specific  
435 cistrome. Vein-specific transcription factors showed the greatest convergence with  
436 enrichment in their cognate DNA binding sites with fifteen mapping to the vein specific  
437 cistrome. This included transcription factors predicted to bind BIRD, Dof, AP2ERF, MYB,  
438 MADS and bHLH motifs (Figure 4C). Overall, this approach identifies families of transcription  
439 factors preferentially expressed in cell types in which their cognate motifs were over-  
440 represented in the cistrome of that cell type. We regard these transcription factors as strong  
441 candidates for patterning gene expression across these cell-types.

442

#### 443 **Conserved patterning of gene expression in bundle sheath cells from rice and** 444 **Arabidopsis**

445 Bundle sheath cells are present in both monocotyledons and dicotyledons. Previous  
446 analysis has compared transcripts loaded onto ribosomes in the bundle sheath of  
447 Arabidopsis with those from whole leaves. In so doing, it was concluded that the bundle  
448 sheath in Arabidopsis is important for sulphur and glucosinolate metabolism as well as  
449 trehalose synthesis (Aubry et al 2014b). Functional enrichment of bundle sheath and  
450 mesophyll preferential genes from rice and Arabidopsis were compared. Consistent with the  
451 mesophyll representing the major cell type conducting photosynthesis, gene sets common  
452 to the mesophyll from the two species included transcripts important for the photosynthetic  
453 electron transport chain and photophosphorylation, the Calvin Benson Bassham cycle,  
454 photorespiration, tetrapyrrole biosynthesis, chloroplast redox homeostasis, organelle  
455 protein biosynthesis and terpenoid biosynthesis (Figure 5A). In contrast, only four categories  
456 of genes were enriched in the bundle sheath from both species, namely carrier-mediated  
457 transport, sulphur assimilation, amino acid biosynthesis and jasmonic acid action (Figure  
458 5A).

459 We next identified genes from both species likely to be descended from a common  
460 ancestor and placed these into orthogroups (Emms and Kelly, 2019). Genes were assigned  
461 to 10,665 orthogroups and the extent to which each was preferentially expressed in

462 mesophyll or bundle sheath cells determined. Genes from 380 orthogroups were  
463 preferentially expressed in mesophyll cells of rice and whole leaves of Arabidopsis, whilst  
464 genes from 293 orthogroups were shared by bundle sheath of both species (Figure 5B), in  
465 both cases a greater overlap than would be expected by chance (Fisher's exact test,  $p <$   
466  $2.2e^{-16}$  for both bundle sheath and mesophyll). However, the odds ratio that is also generated  
467 from the Fisher's exact test indicated that there was a greater degree of overlap between  
468 the mesophyll of rice and whole leaves of Arabidopsis than between their bundle sheath  
469 cells (odds ratios were 5.32 and 2.06 for mesophyll and bundle sheath respectively). We  
470 thus conclude that the expression of orthologs has diverged more in the bundle sheath than  
471 the mesophyll of these species. Specific orthogroups associated with the mesophyll in both  
472 species were mainly associated with photosynthesis but also included eleven orthogroups  
473 of transcription factors, one of which included the transcription factor *GLK1* (OG0002393)  
474 (Supplemental table 5) that is known to activate photosynthesis related gene expression  
475 (Waters et al., 2008; Waters et al., 2009). Although fewer orthogroups were common to the  
476 bundle sheath in rice and Arabidopsis, overlap included three groups encoding aquaporins  
477 (PIP1 - OG0000721, PIP2 -OG0000170 and TIP1 - OG0002706), as well as orthologs  
478 involved in sulphate transport (OG0005139 and OG0013047), sulphate assimilation  
479 (OG0001744, OG0003507 and OG0009859) and jasmonic acid biosynthesis (OG0002794,  
480 OG0005175, OG0010544) (Figure 5C-F, Supplemental Figure 7, Supplemental Table 5).  
481 We compared bundle sheath preferentially expressed genes of rice and Arabidopsis with  
482 the bundle sheath marker genes identified through single cell sequencing of Arabidopsis  
483 (Kim et al., 2021). As sequencing depth from single celled sequencing is not as great, fewer  
484 transcripts were detected (Supplemental Figure 8A). However, 41 orthogroups were  
485 identified containing at least one gene preferential to the bundle sheath in all three studies,  
486 including two sulphate transporters (OG0005139 and OG0013047), ATP sulfurylase  
487 (OG0001744), and allene oxide cyclase (OG0005175). To investigate whether these genes  
488 are associated with bundle sheath cells in a broader range of species, we assessed  
489 transcript abundance of consensus orthogroups associated with water transport, sulphur  
490 assimilation, jasmonic acid biosynthesis as well as nitrate reduction in publicly available data  
491 from *Panicum virgatum* (Rao et al., 2016), *Sorghum bicolor* (Emms et al., 2016), *Setaria*  
492 *italica* (John et al., 2014) and *Zea mays* (Chang et al., 2012) as well as the C<sub>4</sub> dicotyledon

493 *Gynandropsis gynandra* (Aubry et al., 2014a). Except for nitrate reduction genes that are  
494 more highly expressed in mesophyll cells, this indicated that in the majority of these species,  
495 genes in each of orthogroup are preferentially expressed in bundle sheath cells  
496 (Supplemental Figure 9). Taken together, the data strongly suggest that sulphur assimilation,  
497 jasmonic acid biosynthesis, and water transport represent ancestral functions associated  
498 with the bundle sheath derived from the last common ancestor of monocotyledons and  
499 dicotyledons.

500 We next wished to identify if any transcription factors were preferentially expressed in  
501 bundle sheath cells of both species. The rice ortholog of the key regulator of the sulphur  
502 starvation response *SULFUR LIMITATION1* (Maruyama-Nakashita et al., 2006), *OsEIL3*  
503 (LOC\_Os09g31400) showed low expression, but consistent with *Arabidopsis*, was more  
504 strongly expressed in bundle sheath compared with mesophyll cells (Supplemental Figure  
505 7). Fourteen transcription factor orthogroups were identified containing at least one ortholog  
506 in both species that was preferential to the bundle sheath (Figure 5G). These included three  
507 Basic Leucine Zipper (OG0000499, OG0002563, OG0005764), C<sub>2</sub>H<sub>2</sub>-type Zinc Finger  
508 (OG0000197), DNA-binding with One Finger (OG0002717), Ethylene Responsive Factor  
509 (OG0000957), two GRAS (OG0000296, OG0005593), Hairy-Related Transcription-Factor  
510 (OG0005688), three MYB (OG0000100, OG0001367 and OG0001681), Nuclear Factor-YB  
511 (OG0000404), and Vascular Plant One-Zinc Finger Protein (OG0002457) transcription  
512 factor families (Figure 5G, Supplemental Figure 7, Supplemental table 6). These data imply  
513 purifying selection has acted to maintain expression of these transcription factors in the  
514 bundle sheath since these species diverged from their last common ancestor prior to the  
515 divergence of the dicotyledons and monocotyledons.



## 516 **Discussion**

### 517 **Patterning of photosynthesis gene expression between cell-types in the rice leaf**

518 Separation of protoplasts followed by cell sorting has provided significant insight into gene  
519 expression in specific cells of roots (Birnbaum et al., 2003; Brady et al., 2007). In leaves,  
520 the ability to separate mesophyll and bundle sheath cells from C<sub>4</sub> plants (Kanai and Edwards,  
521 1973; Edwards and Black, 1971; Moore et al., 1984) has allowed similar levels of insight into  
522 these cells, but leaf cells from C<sub>3</sub> species have been more challenging to isolate. As a  
523 consequence, although major cell-types of leaves such as the mesophyll, phloem, xylem  
524 and guard cells have well defined roles, others such as the bundle sheath are relatively  
525 poorly understood (Leegood, 2008). In Arabidopsis the bundle sheath is thought to play  
526 important roles in regulating hydraulic conductance, substrate transport and storage (Shatil-  
527 Cohen et al., 2011; Sade et al., 2014; Griffiths et al., 2013). Analysis of mRNAs resident on  
528 ribosomes showed that patterns of gene expression in the Arabidopsis bundle sheath are  
529 conditioned to facilitate sulfur metabolism and glucosinolate biosynthesis (Aubry et al.,  
530 2014b). Although, suppression of chlorophyll synthase in veinal tissue including bundle  
531 sheath cells of Arabidopsis reduced photosynthesis, growth and fitness (Janacek et al.,  
532 2009), the importance of the bundle sheath itself was not defined. Moreover, in C<sub>3</sub>  
533 monocotyledons, the group containing many of our most important crops, little is known  
534 about the function of bundle sheath cells. To address this, we defined gene expression in  
535 the rice bundle sheath as well as mesophyll and vein cells using laser capture  
536 microdissection coupled with mRNA sequencing. Contrary to our expectations, this indicated  
537 that although bundle sheath cells of rice contain few chloroplasts (Wang et al., 2017; Sage  
538 and Sage, 2009), transcripts encoding components of the photosynthetic electron transport  
539 chain and the Calvin Benson Bassham cycle were clearly expressed in rice bundle sheath  
540 cells. The consequence of this finding is that expression of photosynthesis genes represents  
541 a continuum from low to medium to high in veins, bundle sheath and mesophyll cells  
542 respectively. Whether this is also the case in Arabidopsis remains to be determined. There  
543 is significant interest in activating photosynthesis the bundle sheath of rice such that  
544 mesophyll and bundle sheath cells could be engineered to carry out C<sub>4</sub> photosynthesis  
545 (Wang et al., 2017; Sage, 2004). The finding that photosynthesis gene expression in the  
546 bundle sheath resembles the mesophyll more than veins indicates that it needs to be re-



547 tuned rather than completely re-programmed to achieve this demanding aim.

548

#### 549 **Expression of C<sub>4</sub> genes in the C<sub>3</sub> rice leaf**

550 Vascular bundles of C<sub>3</sub> plants are known to carry out C<sub>4</sub>-like metabolism via high activities  
551 of C<sub>4</sub> acid decarboxylases and PPDK to make use of C<sub>4</sub> acids present in the transpiration  
552 stream (Hibberd and Quick, 2002; Brown et al., 2010; Shen et al., 2016). To date, it has not  
553 been possible to define whether high activity of these C<sub>4</sub> enzymes in C<sub>3</sub> plants is associated  
554 with their expression in vein or bundle sheath cells. The analysis of rice we present here  
555 shows that transcripts encoding two C<sub>4</sub> acid decarboxylases, NADP-ME and PCK, were  
556 more abundant in bundle sheath compared with mesophyll cells, but in both cases,  
557 transcripts were even more strongly expressed in veins. These findings suggest that the  
558 high activity of NADP-ME and PCK in vascular tissue is primarily caused by expression in  
559 veins rather than the bundle sheath. Thus, the gradient in expression of genes encoding  
560 these C<sub>4</sub> acid decarboxylases from high in veins to low in mesophyll is the opposite of  
561 photosynthesis genes in these cell types. Whether this is also the case in C<sub>3</sub> dicotyledons  
562 such as *Arabidopsis* remains to be determined.

563 Although there was no significant difference in *PPDK* transcript abundance between  
564 bundle sheath and mesophyll cells, we detected greater abundance of transcripts encoding  
565 *AMK* and *PPase* which carry out ancillary reactions allowing the *PPDK* reaction to proceed.  
566 As activity of *PPDK* is higher in vascular strands of rice than in mesophyll cells (Shen et al.,  
567 2016), it is therefore possible that this is caused by greater activity of *AMP* and *PPase*.  
568 *PPDK* is important for nitrogen recycling in *Arabidopsis* and tobacco (Taylor et al., 2010) and  
569 so these data also suggest that this is likely the case in rice. Although *CA* and *PEPC*  
570 transcripts in rice were most abundant in mesophyll cells, the particular isoforms these  
571 transcripts encode are predicted to generate proteins localized to the chloroplast (Masumoto  
572 et al., 2010; Chen et al., 2017). In C<sub>4</sub> leaves, both of these proteins are cytosolic (Hatch,  
573 1987; Hatch and Burnell, 1990). Overall, these results suggest that at least three  
574 modifications to expression of these genes would be required to build a C<sub>4</sub> cycle into rice –  
575 amplifying the existing expression of C<sub>4</sub> acid decarboxylases in bundle sheath cells,  
576 repositioning *CA* and *PEPC* proteins such that they reside in the cytosol, and expressing  
577 *AMK* and *PPase* in the mesophyll for effective *PPDK* activity.

578

579 **The rice bundle sheath is conditioned to allow water transport, sulphate and nitrate**  
580 **metabolism**

581 Our analysis of the rice bundle sheath indicates that gene expression is poised to allow  
582 photosynthesis in this cell type. This finding is consistent with the fact that although during  
583 early leaf development plastids of the rice bundle sheath contain significant amount of starch,  
584 as the leaf matures these plastids develop into chloroplasts (Miyake, 2016). Transcripts  
585 patterns in the bundle sheath were consistent with starch being synthesized from carbon  
586 skeletons derived from the Calvin Benson Bassham cycle with strong expression of *PGI*,  
587 *PGM*, *UGP1*, *SSIIB* and *SSIII-1*, and low expression of hexose phosphate transporters  
588 (*GPT1*, *GPT2-1*) compared with the *TPT1*. Our analysis also indicates that the rice bundle  
589 sheath is patterned to facilitate water transport and storage, sulphate and nitrate assimilation.  
590 It was notable that most of highly expressed aquaporins were preferentially expressed in  
591 bundle sheath cells, and included members of the PIP1, PIP2, TIP1 and TIP2 subfamilies.  
592 It has been reported that water transport activity and plasma membrane localization of PIP1  
593 requires interaction with PIP2 (Fetter et al., 2004; Zelazny et al., 2007) and so their co-  
594 expression in the bundle sheath is compatible with efficient water transport and storage in  
595 this cell type. Notably, analysis of publicly available data indicates that strong expression of  
596 *PIP1* and *PIP2* in the bundle sheath is also found in the C<sub>4</sub> grasses *Panicum virgatum*,  
597 *Sorghum bicolor*, *Setaria italica* and *Zea mays* as well as the C<sub>4</sub> dicotyledon *Gynandropsis*  
598 *gynandra* (Rao et al., 2016; Emms et al., 2016; John et al., 2014, Chang et al., 2012; Aubry  
599 et al., 2014a), implying that bundle sheath plays important role in water transport in the  
600 common ancestor of monocotyledons and dicotyledons (Supplemental Figure 9).

601 Enzymes of sulphur assimilation preferentially accumulate in the bundle sheath of C<sub>4</sub>  
602 grasses and C<sub>3</sub> dicotyledon *Arabidopsis* (Gerwick et al., 1980; Passera and Ghisi, 1982;  
603 Burnell, 1984; Schmutz and Brunold, 1984; Burgener et al., 1998; Aubry et al., 2014b;  
604 Chang et al., 2012; John et al., 2014; Emms et al. 2016; Rao et al., 2016), but this is not the  
605 case in wheat and the C<sub>4</sub> dicotyledons *Flaveria* and *Gynandropsis gynandra* where ATPS  
606 and APR showed similar activity and/or transcript abundance in bundle sheath and  
607 mesophyll cells (Schmutz and Brunold, 1984; Kopriva et al., 2001; Aubry et al., 2014a). We  
608 found that transcripts associated with sulphur assimilation were restricted or preferentially

609 localized to bundle sheath cells of rice, which is consistent with expression patterns in  
610 Arabidopsis (Aubry et al., 2014b). This was also true for genes indirectly associated with  
611 sulphur assimilation such as the PPase that increases the rate of the ATP sulphurylase  
612 reaction. Several evolutionary drivers for localization of sulphur assimilation in the bundle  
613 sheath of C<sub>4</sub> grasses have been discussed including co-localisation with photorespiration as  
614 a source of serine for cysteine synthesis and protection of the reaction intermediates from  
615 oxidation by Photosystem II derived oxygen (Kopriva and Koprivova, 2005).

616 In Arabidopsis glucosinolate synthesis is controlled by a MYC-MYB transcription factor  
617 module that has recently been shown to pattern gene expression to the bundle sheath  
618 (Dickinson et al 2020). It seemed likely that localisation of glucosinolates to the bundle  
619 sheath of Arabidopsis led to upregulation of ATPS and APR in these cells. However, the  
620 preferential expression of genes associated with sulphur assimilation in the rice bundle  
621 sheath that does not synthesise glucosinolates indicates a much more ancient role for the  
622 bundle sheath in sulphur assimilation. It also removes the proposed connection between C<sub>4</sub>  
623 photosynthesis and localisation of sulphur assimilation in the bundle sheath. More broadly,  
624 it appears that the bundle sheath is conditioned for sulphur assimilation in all species  
625 analysed to date. In plants such as wheat, *Flaveria* and *Gynandropsis*, mesophyll cells are  
626 also used (Schmutz and Brunold, 1984; Koprivova et al., 2001; Aubry et al., 2014a), but in  
627 others the pathway appears to be restricted to the bundle sheath (Supplemental Figure 9).  
628 It is not clear whether the ancestral state was for gene expression allowing sulphur  
629 assimilation to be associated with bundle sheath and mesophyll cells or whether in some  
630 species expression in mesophyll cells has been gained. Moreover, a full complement of  
631 transporters and enzymes for nitrate reduction were found to preferentially be expressed in  
632 rice bundle sheath cells, other enzymes that serve to provide carbon skeleton for amino acid  
633 metabolism such as PEPC (Masumoto et al., 2010) and PPDK (Taylor et al., 2010) also  
634 showed high expression in these cells. The compartmentation of nitrate and ammonia  
635 assimilation gene expression between bundle sheath and mesophyll cells of rice contrasts  
636 with their spatial separation of C<sub>4</sub> grasses and *Gynandropsis gynandra*, where nitrate  
637 reduction predominately takes place in the mesophyll, and ammonia assimilation occurs in  
638 the bundle sheath (Supplemental Figure 9). The strong expression of genes associated with  
639 nitrate reduction to our knowledge has not previously been reported in any system.

640 Furthermore, it has implications for our understanding of transitions associated with the  
641 evolution of the C<sub>2</sub> and C<sub>4</sub> pathways, since modelling revealed that early changes to C<sub>2</sub>  
642 metabolism should induce an imbalance in nitrogen metabolism between bundle sheath and  
643 mesophyll cells (Mallmann et al., 2014). It has been proposed that this imbalance could be  
644 counteracted by upregulating genes associated with C<sub>4</sub> photosynthesis (Mallmann et al.,  
645 2014). Indeed, transcripts for key genes of nitrate assimilation are consistently more strongly  
646 expressed in mesophyll cells of C<sub>4</sub> plants (Supplementary Figure 9, Rao et al., 2016; Emms  
647 et al., 2016; John et al., 2014, Chang et al., 2012; Aubry et al., 2014a). The consequences  
648 and the drivers of gene expression associated with nitrate reduction being focused on the  
649 bundle sheath in rice are unknown. However, this co-localisation of sulphur and nitrate  
650 assimilation in the rice bundle sheath was associated with preferential expression of specific  
651 ferredoxins that have previously only been implicated in differences in electron transfer  
652 reactions allowing CO<sub>2</sub> or mineral nutrient reduction in shoots and roots (Yonekura-  
653 Sakakibara et al., 2000).

654 The ancestors of rice and Arabidopsis diverged ~140 million years ago (Chaw et al., 2004).  
655 Despite this timescale significant overlap in cell-specific gene expression in bundle sheath  
656 and mesophyll cells from these two C<sub>3</sub> species was detected. We conclude that the two cell  
657 types have retained specific roles over this extended time. Less overlap was found in bundle  
658 sheath cells suggesting that the role of the bundle sheath has evolved faster than the  
659 mesophyll. However, despite these apparent changes to gene expression in the bundle  
660 sheath, some genes associated with water transport and jasmonic acid biosynthesis were  
661 preferential to bundle sheath cells in majority of species. In contrast to sulphur assimilation,  
662 we therefore propose that these processes represent ancestral functions derived from the  
663 last common ancestor of monocotyledons and dicotyledons. Moreover, a small number of  
664 transcription factors were strongly bundle sheath preferential in both species, and so we  
665 propose that these regulators underpin ancestral and conserved functions of bundle sheath  
666 cells in dicotyledons and monocotyledons.

## 667 **Materials and methods**

### 668 **Plant growth condition and sample preparation**

669 The temperate rice (*Oryza sativa* ssp. *japonica*) Kitaake was germinated and grown in a  
670 mixture of 1:1 topsoil and sand for 2 weeks in a controlled environment growth room.  
671 Temperature was set to 28°C day, 25°C night, and photoperiod at 12 hr light and 12 hr dark.  
672 Relative humidity was 60% and photon flux density 300  $\mu\text{mol m}^{-2} \text{s}^{-1}$ . 1cm sections from the  
673 middle of the fourth fully expanded leaves were sampled 4 hours after dawn. Leaf tissue  
674 was fixed and embedded into Steedman's wax as described previously (Hua and Hibberd,  
675 2019) with minor modifications. For example, rice leaves were fixed in 100% (v/v) acetone  
676 on ice for 4 hours and before embedding tissue infiltrated with 100% Steedman's wax at  
677 37 °C overnight. For laser capture microdissection (LCM) and RNA extraction, paradermal  
678 sections of 7 microns were prepared with a microtome and mounted on PEN membrane  
679 slides. Prior to LCM Steedman's wax was removed by incubating slides in 100% (v/v)  
680 acetone for 1 min. LCM was performed on an Arcturus Laser Capture Microdissection  
681 platform, with isolated cells being collected on CapSure Macro Caps and RNA extracted  
682 using the PicoPure RNA Isolation Kit with on-column DNaseI treatment. RNA quality and  
683 concentration were analyzed using an Agilent Bioanalyser RNA 6000 Pico assay.

684 For RNA *in situ* hybridization, middle sections from the fourth fully expanded leaf were  
685 sampled and fixed overnight using FAA fixative (50% (v/v) ethanol, 5% (v/v) acetic acid and  
686 3.7% (v/v) formaldehyde. They were then dehydrated through an ethanol series of 50%,  
687 70%, 85%, 95% and 100% (v/v) and embedded into Steedman's wax as described  
688 previously (Hua and Hibberd, 2019). 8 micron thick sections were obtained on a microtome  
689 and mounted onto Superfrost plus slides. Tissue pretreatment, hybridization and colour  
690 development were performed as previously described (Jackson, 1992), except that  
691 Steedman's wax was removed by incubating slides in 100% ethanol for 5 mins twice.

692

### 693 **Library preparation, RNA sequencing and data processing**

694 20 ng of bundle sheath, mesophyll and veinal RNA was used as input for the Quantseq  
695 3' mRNA-seq library preparation kit (Lexogen, Moll et al., 2014) according to the  
696 manufacturer's instructions. Libraries were sequenced using Nextseq 500 sequencer to  
697 produce single-ended 150-bp reads for each sample. The leading and tailing 10-bp of

698 Quantseq reads were trimmed and reads with a quality score less than 20 and shorter than  
699 50-bp were removed using BBDuk (Bushnell, 2015). Transcript abundance was determined  
700 after the remaining reads were quantified using Salmon version 0.8.2 (Patro et al., 2017)  
701 against the rice cDNA reference (MSU version7), '--noLengthCorrection' flag was used to  
702 disable length correction (Corley et al., 2019). Gene level abundance (TPM, transcript per  
703 million) and counts were summarized using tximport version 1.10.1 (Soneson et al., 2016)  
704 and gene level counts were used for downstream differential gene expression analysis using  
705 DESeq2 version 1.22.2 (Love et al., 2014) and edgeR version 3.24.3 (Robinson et al., 2010).  
706 Poorly expressed genes with row sum of TPM < 1 in three samples were excluded, resulting  
707 in 15168 genes; and a Benjamini-Hochberg corrected *P*-value (DESeq2) and False  
708 discovery rate (edgeR) of <0.05 were used to define differentially expressed genes.

709 To quantify the abundance of transcript associated with ribosomes of Arabidopsis BS and  
710 total leaf samples, reads were obtained at Sequence Read Archive (SRA,  
711 <https://www.ncbi.nlm.nih.gov/sra/>) Bioproject accession PRJEB5030 and quantified using  
712 Salmon version 0.8.2 against the Arabidopsis TAIR10 reference (Berardini et al., 2015)  
713 using default parameters, gene level abundance (TPM, transcript per million) was  
714 summarized using tximport version 1.10.1 (Soneson et al., 2016). Differentially expressed  
715 genes were defined according to Aubry et al., 2014b.

716

### 717 **Gene clustering, over-representation analysis and gene expression visualisation**

718 Consensus differentially expressed genes identified using DESeq2 and edgeR in each  
719 pairwise comparison were used for gene expression clustering and functional enrichment  
720 analysis. Gene expression clustering were performed with K-Means method (Hartigan and  
721 Wong, 1979) using log<sub>2</sub> transformed quantile normalized TPM (transcript per million). For  
722 functional enrichment, rice proteome (MSU version7) were firstly annotated by Mapman  
723 categories using Mercator 4 (Schwacke et al., 2019), over-representation analysis of Mapman  
724 categories were performed using Fisher's exact test and using the expressed 15168 genes  
725 as background with false discovery rate (FDR) < 0.1. Rice transcription factor families were  
726 annotated according to PlantTFDB v5.0 (Jin et al., 2017), using all expressed transcription  
727 factor as background, over-representation test were performed using Fisher's exact test with  
728 a cutoff FDR < 0.1. Significant Mapman categories and transcription factor families were



729 plotted using ggplot2 (Wickham, 2016). Heatmap of gene expression clusters and pathways  
730 were plotted using ComplexHeatmap package (Gu et al., 2016). Transcript abundance were  
731 presented in boxplot of TPM (transcript per million) using default settings of hinge and  
732 whisker in ggplot2.

733

### 734 **Motif enrichment analysis**

735 Leaf DNase I hypersensitive sites (DHS) (Zhang et al., 2012) within 2000-bp of the  
736 genes were extracted and used as input to the AME tool (<http://meme-suite.org/tools/ame>,  
737 Bailey et al., 2015; McLeay and Bailey, 2010) using default settings and a custom  
738 background of all DHS regions within 2000bp of gene loci as well as for FIMO command  
739 line tool (Grant et al., 2011) using default settings. The meme format Jaspas Plant Non-  
740 Redundant Motif Database (Fornes et al., 2020, <http://jaspar2018.genereg.net/downloads/>)  
741 was used for both methods. FIMO scanning identified significant matches to known motifs  
742 and the frequencies of these sites were statistically tested for enrichment or depletion using  
743 permutation testing with the regioneR R package (Gel et al., 2016). For permutation testing,  
744 all DHS regions within 2000bp of genes were used as a background for random subsampling  
745 and observed frequencies were statistically tested against the random subsampling  
746 distributions. As the Jaspas motif database contains many motifs with high similarity  
747 predicted to be bound by closely related transcription factors, we grouped similar motifs  
748 together that showed a higher than 70% overlap in predicted target sites within the DHS  
749 background sequences representing motifs that were deemed highly redundant. The most  
750 strongly enriched individual motif from each such group was used as a representative value  
751 for the group and plotted using ggplot2 (Wickham and Sievert, 2016). In order to predict  
752 which *O. sativa* transcription factors might bind predicted motifs, we mapped rice  
753 transcription factors to their best match motif through protein homology with the Jaspas Non-  
754 Redundant Motif database proteins (Fornes et al., 2020). The best scoring BLASTP match  
755 was used as long as bit-score was greater than 100 to avoid spurious assignments to motifs  
756 from other TF families. For all transcription factors found in the 6 clusters, those that were  
757 mapped to an enriched motif from any of the 6 clusters was plotted using the single motif  
758 enrichment scores, rice transcription factors were annotated according to funRiceGenes  
759 database (Yao et al., 2018).



760

## 761 **Defining orthogroups in rice and Arabidopsis**

762 Protein sequences of primary transcripts of *Oryza sativa* (v7.0), *Arabidopsis thaliana*  
763 (TAIR10), *Gynandropsis gynandra* (Aubry et al., 2014a), *Brachypodium distachyon* (v3.2),  
764 *Panicum virgatum* (v1.1), *Sorghum bicolor* (v1.4), *Setaria italica* (v2.1), *Zea mays* (Ensembl-  
765 18) and *Marchantia polymorpha* (v3.1) obtained from Phytozome v12.1 (Goodstein et al.,  
766 2012) were clustered into orthogroups using Orthofinder version 2.4.1 (Emms and Kelly,  
767 2019) with the default parameters, orthogroups that contain both rice and Arabidopsis genes  
768 were used for comparative analysis in the two species. Resolved gene trees of orthogroups  
769 were visualized using R package ggtree version 2.41 (Yu, 2020).

770

## 771 **Code and data availability**

772 Code associated with this manuscript and the underlying data required to generate plots  
773 are available in the Github repository: [https://github.com/hibberd-](https://github.com/hibberd-lab/Hua_et_al_Kitaake_LCM)  
774 [lab/Hua\\_et\\_al\\_Kitaake\\_LCM](https://github.com/hibberd-lab/Hua_et_al_Kitaake_LCM). All other data are available on request.

775

## 776 **Accession numbers**

777 Raw sequencing data are deposited in the National Center for Biotechnology Information  
778 under BioProject ID PRJNA702624, BioSample ID SAMN17976370 - SAMN17976383.

779

## 780 **Acknowledgements**

781 The work was funded by C<sub>4</sub> Rice project grant from The Bill and Melinda Gates  
782 Foundation to the University of Oxford (2015–2019), European Research Council Grant  
783 694733 Revolution, BBSRC Grants BBP0031171 and BBL014130 to JMH. Research in SK's  
784 lab is funded by the Deutsche Forschungsgemeinschaft (DFG) under Germany's Excellence  
785 Strategy – EXC 2048/1 – project 390686111.

786

## 787 **Competing interests**

788 The authors declare that they have no competing interests.

789 **Figure legends**

790 **Figure 1. RNA was isolated from mesophyll, bundle sheath and veinal cells of rice**  
791 **using laser capture microdissection.** Each cell-type was identified and then sequentially  
792 removed from paradermal sections prior to RNA quality being assessed. (A&B)  
793 Representative image of mesophyll cells outlined with red dash line (A) that are cut with a  
794 UV laser and then captured with an infrared laser and placed on a cap (B). (C&D) Bundle  
795 sheath cells (C) were then cut and captured (D). (E&F) Lastly, veinal cells (E) were cut and  
796 captured (F). Scale bars represents 50 microns. (G-I) Representative RNA profiles from  
797 microdissected mesophyll (G), bundle sheath (H) and veinal cells (I). Peaks from the  
798 cytosolic 25S, 18S and 5S ribosomal RNAs were detected in all cell types. Chloroplastic  
799 ribosomal RNAs (CP rRNA) were clearly detectable in mesophyll and bundle sheath cells.  
800 (J) Spearman ranked correlations of  $\log_2$  transformed TPM (transcripts per million) indicates  
801 little variation between biological replicates from each cell type, and distinct patterns of gene  
802 expression in each cell type. (K) Principal component analysis of normalised counts after  
803 variance-stabilizing transformation showing that cell type accounted for 46.1% of the  
804 variance detected in the data. (L) Primary Mapman categories associated with differentially  
805 expressed genes in bundle sheath and mesophyll cells. Terms were defined using Fisher's  
806 exact test (False discovery rate,  $FDR < 0.1$ ), colour scale represents negative  $\log_{10}$   
807 transformed FDR, gene ratio represents the ratio of matched genes in categories relative to  
808 total number of differentially expressed genes in each cell type. (M) Metabolic overviews of  
809 differentially expressed genes between bundle sheath and mesophyll. Colour scale presents  
810 the  $\log_2$  fold change. (N) k-mean clustering of 4155 differentially expressed transcripts was  
811 performed using  $\log_2$  transformed quantile-normalized TPM (transcripts per million) and  
812 visualized in a heatmap. Clusters were named as  $C_M$ ,  $C_{BS}$ ,  $C_V$ ,  $C_{BS\&M}$ ,  $C_{BS\&V}$ , and  $C_{M\&V}$ .  $C_M$   
813 contained 613 genes that were strongest in mesophyll cells,  $C_{BS}$  contained 285 genes with  
814 preferential expression in bundle sheath cells,  $C_V$  contained 972 genes that were strongest  
815 in veins,  $C_{BS\&M}$  1136 genes mostly highly expressed in mesophyll and bundle sheath cells,  
816  $C_{BS\&V}$  1015 genes that were preferential to bundle sheath and veinal cells, and  $C_{M\&V}$  134  
817 genes strongly expressed in both mesophyll and veinal cells. Colour scale represents Z-  
818 score. (O) Schematic illustrating the enriched primary categories derived from Mapman  
819 using Fisher's exact test ( $FDR < 0.1$ ) for each of the six clusters, colour scale indicates

820 negative log<sub>10</sub> transformed FDR, size of dots (GeneRatio) represents the ratio of matched  
821 genes in each category relative to total number of genes in each cluster.

822

823 **Figure 2. Preferential accumulation of transcripts associated with water transport,**  
824 **sulphur and nitrogen assimilation in the rice bundle sheath.** (A) Relative transcript  
825 abundance for aquaporins in mesophyll, bundle sheath and veinal cells. Log<sub>2</sub> transformed  
826 quantile normalized TPM were scaled and genes with similar expression pattern were  
827 clustered using hierarchical method. (B) Representative image after *in situ* hybridization  
828 localization for *PIP1.1* and *PIP1.3* mRNAs, scale bars represent 20 microns, red arrows  
829 indicate specific signal on bundle sheath cell periphery. (C) Schematic illustrating sulphur  
830 assimilation and relative transcript abundance in mesophyll (M), bundle sheath (BS) and  
831 veinal (V) cells depicted as Z-score from log<sub>2</sub> transformed quantile normalized TPM. (D)  
832 Representative image after *in situ* hybridization for *ATPSb* and *SIR* mRNAs, scale bars  
833 represent 20 microns, red arrows indicate specific signal on bundle sheath cell periphery.  
834 (E) Transcript abundance of *CLT1* and *HAC1;1*. (F) Relative transcript abundance for genes  
835 involved in nitrogen assimilation.

836

837 **Figure 3. Relative transcript abundance for genes involved in Calvin Benson**  
838 **Bassham cycle (B) and photorespiration (C) and C<sub>4</sub> pathway (D) in mesophyll (M),**  
839 **bundle sheath (BS) and veinal (V) cells of rice.** (A) Paradermal section of rice leaf stained  
840 with toluidine blue shows bundle sheath cells are less occupied by chloroplasts compared  
841 with mesophyll cells, scale bar represents 50 microns. (B&C) Transcripts associated with  
842 Calvin Benson Bassham cycle (B) and photorespiration (C) were preferentially expressed in  
843 mesophyll cells, log<sub>2</sub> transformed quantile normalized TPM were scaled and genes with  
844 similar expression pattern were clustered using hierarchical method. (D) Transcripts  
845 encoding the C<sub>4</sub> acid decarboxylases NADP-DEPENDENT MALIC ENZYME (NADP-ME)  
846 and PHOSPHOENOLPYRUVATE CARBOXYKINASE (PCK) accumulated preferentially in  
847 bundle sheath and veinal cells whilst ancillary enzymes AMP KINASE (AMK) and  
848 PYROPHOSPHORYLASE (PPASE) for PYRUVATE, ORTHOPHOSPHATE DIKINASE  
849 (PPDK) accumulated preferentially in bundle sheath cells, data are presented as TPM

850 (transcript per million), asterisks indicate statistically significant difference (FDR and adjust  
851  $P < 0.05$  using edgeR and DESeq2 analysis).

852

853 **Figure 4 Patterning of transcription factors between mesophyll, bundle sheath and**  
854 **veinal cells of rice. (A)** Transcription factors from cluster  $C_M$ ,  $C_{BS}$ ,  $C_V$ ,  $C_{BS\&M}$ ,  $C_{BS\&V}$ , and  
855  $C_{M\&V}$  were designated as  $TF_M$ ,  $TF_{BS}$ ,  $TF_V$ ,  $TF_{BS\&M}$ ,  $TF_{BS\&V}$ , and  $TF_{M\&V}$  respectively, relative  
856 abundance of differentially expressed transcription factors were presented as heatmap and  
857 line plot of Z-score which is calculated from  $\log_2$  transformed quantile normalized TPM, red  
858 lines in line plot represent mean of Z-score. **(B)** Significantly enriched or depleted motifs  
859 were identified in each of the cistromes from the 6 gene expression clusters, enrichment  
860 was calculated using the regioneR permutation testing package (Gel et al., 2016) following  
861 motif scanning using FIMO to identify motifs from the plant Jaspar non-redundant database  
862 (Fornes et al., 2020). The Z-scores are shown with a colour scale to show the magnitude of  
863 enrichment (dark blue) or depletion (yellow) for motifs that were significant after multiple  
864 testing correction. Motifs derived from closely related TFs were grouped together for  
865 visualisation based on their degree of overlap to predicted target sites (e.g. AP2ERFs). The  
866 cistrome from cluster  $C_V$  shows the greatest number of enriched motifs, including 13  
867 uniquely enriched, while the  $C_M$  and  $C_{BS}$  cistromes have far fewer. **(C)** Cluster specific TFs  
868 (left of panel) were mapped to motifs (right of panel) they would be most likely to bind based  
869 on high protein sequence similarity with the proteins in the Jaspar plant motif database. The  
870 TFs that mapped to any enriched motifs are shown with the motif enrichment data. This  
871 allows visualisation of the intersection between TF transcript abundance with potential  
872 activation activity. Gene symbols of rice transcription factors were retrieved from  
873 funRiceGene database (Yao et al., 2018) but for the symbols not found in the database,  
874 symbols of best hit Arabidopsis transcription factors were used and presented in blue. The  
875 matching motifs show first the best match and then the motif group if part of a group as  
876 shown in 4B.

877

878 **Figure 5. Conserved patterning of gene expression in the Arabidopsis and rice bundle**  
879 **sheath.** Orthologs from Arabidopsis and rice associated with aquaporins, sulphate transport  
880 and assimilation as well as jasmonic acid biosynthesis are strongly expressed in bundle

881 sheath cells. (A) The enriched Mapman categories (secondary level) of BS and M  
882 preferential genes in rice and Arabidopsis were defined using Fisher's exact test (FDR<0.1).  
883 (B) Venn diagram illustrating the extent to which genes in the same orthogroup are  
884 preferentially expressed in mesophyll or bundle sheath cells of both rice and  
885 Arabidopsis. (C-G) Transcript abundance of Arabidopsis and rice genes belonging to the  
886 same orthogroups of aquaporins (C), sulphate transport (D), sulphate assimilation (E) ,  
887 jasmonic acid biosynthesis (F), and transcription factors (G). Data are presented as TPM  
888 and statistically significant differences annotated with an asterisk (FDR and adjust  $P < 0.05$   
889 using edgeR and DESeq2 analysis in this study, PPDE>0.95 in Aubry et al., 2014b), red and  
890 green bars represent bundle sheath and mesophyll respectively.

891

## 892 **Supplemental Data**

893 **Supplemental Figure S1.** Transcript abundance of genes previously reported to be  
894 associated with mesophyll, bundle sheath or veins.

895 **Supplemental Figure S2.** Mapman categories and metabolic overview of pairwise  
896 comparisons between bundle sheath (BS) and vein (V) and between mesophyll (M) and vein  
897 (V).

898 **Supplemental Figure S3.** Enriched transporter families in the six gene expression clusters.

899 **Supplemental Figure S4.** Transcript abundance of genes associated with nitrogen  
900 assimilation.

901 **Supplemental Figure S5.** Transcript abundance of genes associated with the  
902 photosynthetic electron transport chain (A, B), Calvin Benson Bassham cycle (C), starch  
903 biosynthesis (D) and photorespiration (E).

904 **Supplemental Figure S6.** Transcription factors associated with different clusters.

905 **Supplemental Figure S7.** Transcript abundance of orthogroups shared by bundle sheath  
906 cells in rice and Arabidopsis associated with aquaporins, sulphate transport and assimilation,  
907 jasmonic acid biosynthesis, and transcription factors.

908 **Supplemental Figure S8.** Comparison of bundle sheath preferentially expressed genes  
909 among different studies.

910 **Supplemental Figure S9.** Transcript abundance of Aquaporins (*PIP1* and *PIP2*), *ATP*  
911 *sulfurylase* (*ATPS*), *APS reductase* (*APR*), *sulfite reductase* (*SIR*), *13-lipoxygenase* (*LOX*),

912 *allene oxidase cyclase (AOC)* and *oxophytodienoate reductase (OPR)*, *nitrate reductase*  
913 *(NIA)* and *nitrite reductase (NIR)* in bundle sheath and mesophyll cells of *A. thaliana* (Aubry  
914 et al., 2014b), *G. gynandra* (Aubry et al., 2014a), *O. sativa* (this study), *P. virgatum* (Rao et  
915 al., 2016), *Z. mays* (Chang et al., 2012), *S. italica* (John et al., 2014) and *S. bicolor* (Emms  
916 et al., 2016).

917 **Supplemental Table S1.** RNA sequencing statistics.

918 **Supplemental Table S2.** Summary of differential gene expression analysis using DESeq2  
919 and edgeR.

920 **Supplemental Table S3.** Pairwise comparison and gene expression clusters.

921 **Supplemental Table S4.** Motif enrichment analysis of the six gene expression clusters.

922 **Supplemental Table S5.** Bundle sheath and mesophyll differentially expressed orthologous  
923 genes in rice and Arabidopsis.

924 **References**

- 925 **Attia, Z., Dalal, A., and Moshelion, M.** (2020). Vascular bundle sheath and mesophyll cells  
926 modulate leaf water balance in response to chitin. *Plant J.* **101**: 1368–1377.
- 927 **Aubry, S., Kelly, S., Kümpers, B.M.C.C., Smith-Unna, R.D., and Hibberd, J.M.** (2014a).  
928 Deep Evolutionary Comparison of Gene Expression Identifies Parallel Recruitment of  
929 Trans-Factors in Two Independent Origins of C<sub>4</sub> Photosynthesis. *PLoS Genet.* **10**:  
930 e1004365.
- 931 **Aubry, S., Smith-Unna, R.D., Bournnell, C.M., Kopriva, S., and Hibberd, J.M.** (2014b).  
932 Transcript residency on ribosomes reveals a key role for the *Arabidopsis thaliana*  
933 bundle sheath in sulfur and glucosinolate metabolism. *Plant J.* **78**: 659–673.
- 934 **Bailey, T.L., Johnson, J., Grant, C.E., and Noble, W.S.** (2015). The MEME Suite. *Nucleic*  
935 *Acids Res.* **43**: 39–49.
- 936 **Berardini, T.Z., Reiser, L., Li, D., Mezheritsky, Y., Muller, R., Strait, E., and Huala, E.**  
937 (2015). The *Arabidopsis* information resource: Making and mining the “gold standard”  
938 annotated reference plant genome. *Genesis* **53**: 474–485.
- 939 **Berry, J.A.** (2012). There Ought to Be an Equation for That. *Annu. Rev. Plant Biol.* **63**: 1–  
940 17.
- 941 **Bezruczyk, M., Zöllner, N.R., Kruse, C.P.S., Hartwig, T., Lautwein, T., Köhrer, K.,**  
942 **Frommer, W.B., and Kim, J.-Y.** (2021). Evidence for Phloem Loading via the Abaxial  
943 Bundle Sheath Cells in Maize Leaves. *Plant Cell*: doi.org/10.1093/plcell/koaa055.
- 944 **Birnbaum, K., Shasha, D.E., Wang, J.Y., Jung, J.W., Lambert, G.M., Galbraith, D.W.,**  
945 **and Benfey, P.N.** (2003). A gene expression map of the *Arabidopsis* root. *Science* **302**:  
946 1956–60.
- 947 **Brady, S.M., Orlando, D.A., Lee, J.Y., Wang, J.Y., Koch, J., Dinneny, J.R., Mace, D.,**  
948 **Ohler, U., and Benfey, P.N.** (2007). A high-resolution root spatiotemporal map reveals  
949 dominant expression patterns. *Science* **318**: 801–806.
- 950 **Brown, N.J. et al.** (2010). C<sub>4</sub> acid decarboxylases required for C<sub>4</sub> photosynthesis are active  
951 in the mid-vein of the C<sub>3</sub> species *Arabidopsis thaliana*, and are important in sugar and  
952 amino acid metabolism. *Plant J.* **61**: 122–133.
- 953 **Burgener, M., Suter, M., Jones, S., and Brunold, C.** (1998). Cyst(e)ine Is the Transport  
954 Metabolite of Assimilated Sulfur from Bundle-Sheath to Mesophyll Cells in Maize



- 955 Leaves. *Plant Physiol.* **116**: 1315–1322.
- 956 **Burnell, J.N.** (1984). Sulfate Assimilation in C<sub>4</sub> Plants. *Plant Physiol.* **75**: 873–875.
- 957 **von Caemmerer, S., Edwards, G.E., Koteyeva, N., and Cousins, A.B.** (2014). Single cell  
958 C<sub>4</sub> photosynthesis in aquatic and terrestrial plants: A gas exchange perspective. *Aquat.*  
959 *Bot.* **118**: 71–80.
- 960 **von Caemmerer, S., Quick, W.P., and Furbank, R.T.** (2012). The development of C<sub>4</sub> rice:  
961 Current progress and future challenges. *Science* **336**: 1671–1672.
- 962 **Chang, Y.M., Liu, W.Y., Shih, A.C.C., Shen, M.N., Lu, C.H., Lu, M.Y.J., Yang, H.W., Wang,**  
963 **T.Y., Chen, S.C.C., Chen, S.M., Li, W.H., and Ku, M.S.B.** (2012). Characterizing  
964 regulatory and functional differentiation between maize mesophyll and bundle sheath  
965 cells by transcriptomic analysis. *Plant Physiol.* **160**: 165–77.
- 966 **Chávez-Bárceñas, A.T., Valdez-Alarcón, J.J., Martínez-Trujillo, M., Chen, L.,**  
967 **Xoconostle-Cázares, B., Lucas, W.J., and Herrera-Estrella, L.** (2000). Tissue-  
968 specific and developmental pattern of expression of the rice *sps1* gene. *Plant Physiol.*  
969 **124**: 641–54.
- 970 **Chaw, S.M., Chang, C.C., Chen, H.L., and Li, W.H.** (2004). Dating the monocot-dicot  
971 divergence and the origin of core eudicots using whole chloroplast genomes. *J. Mol.*  
972 *Evol.* **58**: 424–441.
- 973 **Chen, T., Wu, H., Wu, J., Fan, X., Li, X., and Lin, Y.** (2017). Absence of *OsβCA1* causes a  
974 CO<sub>2</sub> deficit and affects leaf photosynthesis and the stomatal response to CO<sub>2</sub> in rice.  
975 *Plant J.* **90**: 344–357.
- 976 **Cho, J. II et al.** (2010). Expression analysis and functional characterization of the  
977 monosaccharide transporters, *OsTMTs*, involving vacuolar sugar transport in rice. *New*  
978 *Phytol.* **186**: 657–668.
- 979 **Corley, S.M., Troy, N.M., Bosco, A., and Wilkins, M.R.** (2019). QuantSeq 3' Sequencing  
980 combined with Salmon provides a fast, reliable approach for high throughput RNA  
981 expression analysis. *Sci. Rep.* **9**: 1–15.
- 982 **Doyama, N., Kajiwara, H., and Ida, S.** (1998). Cloning and expression of a ferredoxin gene  
983 in rice roots in response to nitrate and ammonium. *Plant Sci.* **137**: 53–62.
- 984 **Edwards, G.E. and Black, C.C.** (1971). Isolation of Mesophyll Cells and Bundle Sheath  
985 Cells from *Digitaria sanguinalis* (L.) Scop. Leaves and a Scanning Microscopy Study of

- 986 the Internal Leaf Cell Morphology. *Plant Physiol.* **47**: 149–56.
- 987 **Emms, D.M., Covshoff, S., Hibberd, J.M., and Kelly, S.** (2016). Independent and Parallel  
988 Evolution of New Genes by Gene Duplication in Two Origins of C<sub>4</sub> Photosynthesis  
989 Provides New Insight into the Mechanism of Phloem Loading in C<sub>4</sub> Species. *Mol. Biol.*  
990 *Evol.* **33**: 1796–1806.
- 991 **Emms, D.M. and Kelly, S.** (2019). OrthoFinder: Phylogenetic orthology inference for  
992 comparative genomics. *Genome Biol.* **20**: 238.
- 993 **Fetter, K., Van Wilder, V., Moshelion, M., and Chaumont, F.** (2004). Interactions between  
994 Plasma Membrane Aquaporins Modulate Their Water Channel Activity. *Plant Cell* **16**:  
995 215–228.
- 996 **Fornes, O. et al.** (2020). JASPAR 2020: Update of the open-Access database of  
997 transcription factor binding profiles. *Nucleic Acids Res.* **48**: D87–D92.
- 998 **Foyer, C.H. and Noctor, G.** (2011). Ascorbate and glutathione: The heart of the redox hub.  
999 *Plant Physiol.* **155**: 2–18.
- 1000 **Fryer, M.J., Oxborough, K., Mullineaux, P.M., and Baker, N.R.** (2002). Imaging of photo-  
1001 oxidative stress responses in leaves. *J. Exp. Bot.* **53**: 1249–1254.
- 1002 **Furbank, R.T.** (2016). Walking the C<sub>4</sub> pathway: past, present, and future. *J. Exp. Bot.* **67**:  
1003 4057–4066.
- 1004 **Gel, B., Díez-Villanueva, A., Serra, E., Buschbeck, M., Peinado, M.A., and Malinverni,**  
1005 **R.** (2016). RegioneR: An R/Bioconductor package for the association analysis of  
1006 genomic regions based on permutation tests. *Bioinformatics* **32**: 289–291.
- 1007 **Gerwick, B.C., Ku, S.B., and Black, C.C.** (1980). Initiation of sulfate activation: A variation  
1008 in C<sub>4</sub> photosynthesis plants. *Science* **209**: 513–515.
- 1009 **Goodstein, D.M., Shu, S., Howson, R., Neupane, R., Hayes, R.D., Fazo, J., Mitros, T.,**  
1010 **Dirks, W., Hellsten, U., Putnam, N., and Rokhsar, D.S.** (2012). Phytozome: A  
1011 comparative platform for green plant genomics. *Nucleic Acids Res.* **40**: D1178.
- 1012 **Grant, C.E., Bailey, T.L., and Noble, W.S.** (2011). FIMO: Scanning for occurrences of a  
1013 given motif. *Bioinformatics* **27**: 1017–1018.
- 1014 **Griffiths, H., Weller, G., Toy, L.F.M., and Dennis, R.J.** (2013). You're so vein: bundle  
1015 sheath physiology, phylogeny and evolution in C<sub>3</sub> and C<sub>4</sub> plants. *Plant. Cell Environ.* **36**:  
1016 249–261.

- 1017 **Grunwald, Y., Wigoda, N., Sade, N., Yaaran, A., Torne, T., Chaka Gosa, S., Moran, N.,**  
1018 **and Moshelion, M.** (2021). Arabidopsis leaf hydraulic conductance is regulated by  
1019 xylem-sap pH, controlled, in turn, by a P-type H<sup>+</sup>-ATPase of vascular bundle sheath  
1020 cells. *Plant J.*: tpj.15235.
- 1021 **Gu, Z., Eils, R., and Schlesner, M.** (2016). Complex heatmaps reveal patterns and  
1022 correlations in multidimensional genomic data. *Bioinformatics* **32**: 2847–2849.
- 1023 **Haberlandt, G.** (1884). *Physiologische Pflanzenanatomie*.
- 1024 **Hartigan, J.A. and Wong, M.A.** (1979). A K-Means Clustering Algorithm. *Appl. Stat.* **28**:  
1025 100.
- 1026 **Hatch, M.D.** (1987). C<sub>4</sub> photosynthesis: a unique blend of modified biochemistry, anatomy  
1027 and ultrastructure. *BBA Rev. Bioenerg.* **895**: 81–106.
- 1028 **Hatch, M.D. and Burnell, J.N.** (1990). Carbonic anhydrase activity in leaves and its role in  
1029 the first step of C<sub>4</sub> photosynthesis. *Plant Physiol.* **93**: 825–828.
- 1030 **He, L. et al.** (2020). Primary leaf-type ferredoxin 1 participates in photosynthetic electron  
1031 transport and carbon assimilation in rice. *Plant J.* **104**: 44–58.
- 1032 **Hernández, L.E., Sobrino-Plata, J., Belén Montero-Palmero, M., Carrasco-Gil, S.,**  
1033 **Flores-Cáceres, L., Ortega-Villasante, C., and Escobar, C.** (2015). Contribution of  
1034 glutathione to the control of cellular redox homeostasis under toxic metal and metalloid  
1035 stress. *J. Exp. Bot.* **66**: 2901–2911.
- 1036 **Hibberd, J.M. and Quick, W.P.** (2002). Characteristics of C<sub>4</sub> photosynthesis in stems and  
1037 petioles of C<sub>3</sub> flowering plants. *Nature* **415**: 451–454.
- 1038 **Hibberd, J.M., Sheehy, J.E., and Langdale, J.A.** (2008). Using C<sub>4</sub> photosynthesis to  
1039 increase the yield of rice—rationale and feasibility. *Curr. Opin. Plant Biol.* **11**: 228–231.
- 1040 **Hua, L. and Hibberd, J.M.** (2019). An optimized protocol for isolation of high-quality RNA  
1041 through laser capture microdissection of leaf material. *Plant Direct* **3**: e00156.
- 1042 **Ibraheem, O., J Botha, C.E., Bradley, G., Dealtry, G., Roux, S., E J Botha, C.C., and**  
1043 **Thiel, E.G.** (2013). Rice sucrose transporter1 (OsSUT1) up-regulation in xylem  
1044 parenchyma is caused by aphid feeding on rice leaf blade vascular bundles. *Plant Biol.*  
1045 **16**: 783–791.
- 1046 **Jackson** (1992). In situ hybridization in plants. In *Molecular plant pathology : a practical*  
1047 *approach* (Oxford University Press), pp. 163–174.

- 1048 **Janacek, S.H., Trenkamp, S., Palmer, B., Brown, N.J., Parsley, K., Stanley, S., Astley,**  
1049 **H.M., Rolfe, S.A., Paul Quick, W., Fernie, A.R., and Hibberd, J.M. (2009).**  
1050 Photosynthesis in cells around veins of the *C<sub>3</sub>* plant *Arabidopsis thaliana* is important  
1051 for both the shikimate pathway and leaf senescence as well as contributing to plant  
1052 fitness. *Plant J.* **59**: 329–343.
- 1053 **Jiao, Y. et al. (2009).** A transcriptome atlas of rice cell types uncovers cellular, functional  
1054 and developmental hierarchies. *Nat. Genet.* **41**: 258–263.
- 1055 **Jin, J., Tian, F., Yang, D.C., Meng, Y.Q., Kong, L., Luo, J., and Gao, G. (2017).** PlantTFDB  
1056 4.0: Toward a central hub for transcription factors and regulatory interactions in plants.  
1057 *Nucleic Acids Res.* **45**: D1040–D1045.
- 1058 **John, C.R., Smith-Unna, R.D., Woodfield, H., Covshoff, S., and Hibberd, J.M. (2014).**  
1059 Evolutionary Convergence of Cell-Specific Gene Expression in Independent Lineages  
1060 of *C<sub>4</sub>* Grasses. *Plant Physiol.* **165**: 62–75.
- 1061 **Jurić, I., González-Pérez, V., Hibberd, J.M., Edwards, G., and Burroughs, N.J. (2016).**  
1062 Size matters for single-cell *C<sub>4</sub>* photosynthesis in *Bienertia*. *J. Exp. Bot.* **68**: 255–267.
- 1063 **Kanai, R. and Edwards, G.E. (1973).** Separation of mesophyll protoplasts and bundle  
1064 sheath cells from maize leaves for photosynthetic studies. *Plant Physiol.* **51**: 1133–7.
- 1065 **Kim, J.-Y. et al. (2021).** Distinct identities of leaf phloem cells revealed by single cell  
1066 transcriptomics. *Plant Cell*: [doi.org/10.1093/plcell/koaa060](https://doi.org/10.1093/plcell/koaa060).
- 1067 **Kinsman, E.A. and Pyke, K.A. (1998).** Bundle sheath cells and cell-specific plastid  
1068 development in *Arabidopsis* leaves. *Development* **125**: 1815–1822.
- 1069 **Kopriva, S. and Koprivova, A. (2005).** Sulfate assimilation and glutathione synthesis in *C<sub>4</sub>*  
1070 plants. *Photosynth. Res.* **86**: 363–372.
- 1071 **Koprivova, A., Melzer, M., Von Ballmoos, P., Mandel, T., Brunold, C., and Kopriva, S.**  
1072 (2001). Assimilatory sulfate reduction in *C<sub>3</sub>*, *C<sub>3</sub>-C<sub>4</sub>*, and *C<sub>4</sub>* species of *Flaveria*. *Plant*  
1073 *Physiol.* **127**: 543–550.
- 1074 **Koroleva, O.A., Gibson, T.M., Cramer, R., and Stain, C. (2010).** Glucosinolate-  
1075 accumulating S-cells in *Arabidopsis* leaves and flower stalks undergo programmed cell  
1076 death at early stages of differentiation. *Plant J.* **64**: 456–469.
- 1077 **Langdale, J.A. (2011).** *C<sub>4</sub>* Cycles: Past, Present, and Future Research on *C<sub>4</sub>*  
1078 Photosynthesis. *Plant Cell* **23**: 3879–3892.

- 1079 **Leegood, R.C.** (2008). Roles of the bundle sheath cells in leaves of C<sub>3</sub> plants. *J. Exp. Bot.*  
1080 **59**: 1663–1673.
- 1081 **Li, G.W., Zhang, M.H., Cai, W.M., Sun, W.N., and Su, W.A.** (2008). Characterization of  
1082 OsPIP2;7, a Water Channel Protein in Rice. *Plant Cell Physiol.* **49**: 1851–1858.
- 1083 **Love, M.I., Huber, W., and Anders, S.** (2014). Moderated estimation of fold change and  
1084 dispersion for RNA-seq data with DESeq2. *Genome Biol.* **15**: 550.
- 1085 **Lunn, J.E. and Furbank, R.T.** (1997). Localisation of sucrose-phosphate synthase and  
1086 starch in leaves of C<sub>4</sub> plants. *Planta* **202**: 106–111.
- 1087 **Mallmann, J., Heckmann, D., Bräutigam, A., Lercher, M.J., Weber, A.P.M., Westhoff, P.,  
1088 and Gowik, U.** (2014). The role of photorespiration during the evolution of C<sub>4</sub>  
1089 photosynthesis in the genus *Flaveria*. *Elife* **3**: e02478.
- 1090 **Maruyama-Nakashita, A., Nakamura, Y., Tohge, T., Saito, K., and Takahashi, H.** (2006).  
1091 *Arabidopsis* SLIM1 is a central transcriptional regulator of plant sulfur response and  
1092 metabolism. *Plant Cell* **18**: 3235–3251.
- 1093 **Masumoto, C., Miyazawa, S.-I.I., Ohkawa, H., Fukuda, T., Taniguchi, Y., Murayama, S.,  
1094 Kusano, M., Saito, K., Fukayama, H., and Miyao, M.** (2010). Phosphoenolpyruvate  
1095 carboxylase intrinsically located in the chloroplast of rice plays a crucial role in  
1096 ammonium assimilation. *Proc. Natl. Acad. Sci. U. S. A.* **107**: 5226–31.
- 1097 **Maughan, S.C. et al.** (2010). Plant homologs of the *Plasmodium falciparum* chloroquine-  
1098 resistance transporter, *PfCRT*, are required for glutathione homeostasis and stress  
1099 responses. *Proc. Natl. Acad. Sci. U. S. A.* **107**: 2331–2336.
- 1100 **McLeay, R.C. and Bailey, T.L.** (2010). Motif Enrichment Analysis: A unified framework and  
1101 an evaluation on ChIP data. *BMC Bioinformatics* **11**: 165.
- 1102 **Miyake, H.** (2016). Starch Accumulation in the Bundle Sheaths of C<sub>3</sub> Plants: A Possible Pre-  
1103 Condition for C<sub>4</sub> Photosynthesis. *Plant Cell Physiol.* **57**: 890–896.
- 1104 **Moll, P., Ante, M., Seitz, A., and Reda, T.** (2014). QuantSeq 3' mRNA sequencing for RNA  
1105 quantification. *Nat. Methods* **11**: i–iii.
- 1106 **Moore, B. d., Ku, M.S.B., and Edwards, G.E.** (1984). Isolation of leaf bundle sheath  
1107 protoplasts from C<sub>4</sub> dicot species and intracellular localization of selected enzymes.  
1108 *Plant Sci. Lett.* **35**: 127–138.
- 1109 **Mustroph, A., Zanetti, M.E., Jang, C.J.H.H., Holtan, H.E., Repetti, P.P., Galbraith, D.W.,**

- 1110 **Girke, T., and Bailey-Serres, J.** (2009). Profiling translomes of discrete cell  
1111 populations resolves altered cellular priorities during hypoxia in *Arabidopsis*. *Proc. Natl.*  
1112 *Acad. Sci.* **106**: 18843–18848.
- 1113 **Nomura, M., Higuchi, T., Ishida, Y., Ohta, S., Komari, T., Imaizumi, N., Miyao-Tokutomi,**  
1114 **M., Matsuoka, M., and Tajima, S.** (2005). Differential Expression Pattern of C<sub>4</sub> Bundle  
1115 Sheath Expression Genes in Rice, a C<sub>3</sub> Plant. *Plant Cell Physiol* **46**: 754–761.
- 1116 **Passera, C. and Ghisi, R.** (1982). ATP Sulphurylase and O-Acetylserine Sulphydrylase in  
1117 Isolated Mesophyll Protoplasts and Bundle Sheath Strands of S-deprived Maize Leaves.  
1118 *J. Exp. Bot.* **33**: 432–438.
- 1119 **Pasternak, M., Lim, B., Wirtz, M., Hell, R., Cobbett, C.S., and Meyer, A.J.** (2007).  
1120 Restricting glutathione biosynthesis to the cytosol is sufficient for normal plant  
1121 development. *Plant J.* **53**: 999–1012.
- 1122 **Patro, R., Duggal, G., Love, M.I., Irizarry, R.A., and Kingsford, C.** (2017). Salmon  
1123 provides fast and bias-aware quantification of transcript expression. *Nat. Methods* **14**:  
1124 417–419.
- 1125 **Rao, X., Lu, N., Li, G., Nakashima, J., Tang, Y., and Dixon, R.A.** (2016). Comparative cell-  
1126 specific transcriptomics reveals differentiation of C<sub>4</sub> photosynthesis pathways in  
1127 switchgrass and other C<sub>4</sub> lineages. *J. Exp. Bot.* **67**: 1649–1662.
- 1128 **Robinson, M.D., McCarthy, D.J., and Smyth, G.K.** (2010). edgeR: a Bioconductor package  
1129 for differential expression analysis of digital gene expression data. *Bioinforma. Appl.*  
1130 *NOTE* **26**: 139–140.
- 1131 **Sade, N., Shatil-Cohen, A., Attia, Z., Maurel, C., Boursiac, Y., Kelly, G., Granot, D.,**  
1132 **Yaaran, A., Lerner, S., and Moshelion, M.** (2014). The Role of Plasma Membrane  
1133 Aquaporins in Regulating the Bundle Sheath-Mesophyll Continuum and Leaf Hydraulics.  
1134 *Plant Physiol.* **166**: 1609–1620.
- 1135 **Sage, R.F.** (2001). Environmental and Evolutionary Preconditions for the Origin and  
1136 Diversification of the C<sub>4</sub> Photosynthetic Syndrome. *Plant Biol.* **3**: 202–213.
- 1137 **Sage, R.F.** (2004). The evolution of C<sub>4</sub> photosynthesis. *New Phytol.* **161**: 341–370.
- 1138 **Sage, R.F., Sage, T.L., and Kocacinar, F.** (2012). Photorespiration and the Evolution of C<sub>4</sub>  
1139 Photosynthesis. *Annu. Rev. Plant Biol.* **63**: 19–47.
- 1140 **Sage, T.L. and Sage, R.F.** (2009). The Functional Anatomy of Rice Leaves: Implications for



- 1141 Refixation of Photorespiratory CO<sub>2</sub> and Efforts to Engineer C<sub>4</sub> Photosynthesis into Rice.  
1142 Plant Cell Physiol. **50**: 756–772.
- 1143 **Sakurai, J., Ishikawa, F., Yamaguchi, T., Uemura, M., and Maeshima, M. (2005).**  
1144 Identification of 33 rice aquaporin genes and analysis of their expression and function.  
1145 Plant Cell Physiol. **46**: 1568–1577.
- 1146 **Sawers, R.J.H., Liu, P., Anufrikova, K., Gene, J.T.G., and Brutnell, T.P. (2007).** A multi-  
1147 treatment experimental system to examine photosynthetic differentiation in the maize  
1148 leaf. BMC Genomics **8**: 12.
- 1149 **Schmutz, D. and Brunold, C. (1984).** Intercellular Localization of Assimilatory Sulfate  
1150 Reduction in Leaves of *Zea mays* and *Triticum aestivum*. Plant Physiol. **74**: 866–870.
- 1151 **Schwacke, R., Ponce-Soto, G.Y., Krause, K., Bolger, A.M., Arsova, B., Hallab, A.,  
1152 Gruden, K., Stitt, M., Bolger, M.E., and Usadel, B. (2019).** MapMan4: A Refined  
1153 Protein Classification and Annotation Framework Applicable to Multi-Omics Data  
1154 Analysis. Mol. Plant **12**: 879–892.
- 1155 **Scofield, G.N., Hirose, T., Aoki, N., and Furbank, R.T. (2007).** Involvement of the sucrose  
1156 transporter, OsSUT1, in the long-distance pathway for assimilate transport in rice. J.  
1157 Exp. Bot. **58**: 3155–69.
- 1158 **Shatil-Cohen, A., Attia, Z., and Moshelion, M. (2011).** Bundle-sheath cell regulation of  
1159 xylem-mesophyll water transport via aquaporins under drought stress: a target of xylem-  
1160 borne ABA? Plant J. **67**: 72–80.
- 1161 **Shen, W., Ye, L., Ma, J., Yuan, Z., Zheng, B., Chuangen, L. V., Zhu, Z., Chen, X., Gao,  
1162 Z., and Chen, G. (2016).** The existence of C<sub>4</sub>-bundle-sheath-like photosynthesis in the  
1163 mid-vein of C<sub>3</sub> rice. Rice **9**: 20.
- 1164 **Soneson, C., Love, M.I., and Robinson, M.D. (2016).** Differential analyses for RNA-seq:  
1165 Transcript-level estimates improve gene-level inferences. F1000Research **4**: 1521.
- 1166 **Taylor, L., Nunes-Nesi, A., Parsley, K., Leiss, A., Leach, G., Coates, S., Wingler, A.,  
1167 Fernie, A.R., and Hibberd, J.M. (2010).** Cytosolic pyruvate, orthophosphate dikinase  
1168 functions in nitrogen remobilization during leaf senescence and limits individual seed  
1169 growth and nitrogen content. Plant J. **62**: 641–652.
- 1170 **Thimm, O., Bläsing, O., Gibon, Y., Nagel, A., Meyer, S., Krüger, P., Selbig, J., Müller,  
1171 L.A., Rhee, S.Y., and Stitt, M. (2004).** MAPMAN: a user-driven tool to display genomics

- 1172 data sets onto diagrams of metabolic pathways and other biological processes. *Plant J.*  
1173 **37**: 914–939.
- 1174 **Tipple, B.J. and Pagani, M.** (2007). The Early Origins of Terrestrial C<sub>4</sub> Photosynthesis.  
1175 *Annu. Rev. Earth Planet. Sci.* **35**: 435–461.
- 1176 **Voznesenskaya, E. V., Franceschi, V.R., Kiirats, O., Freitag, H., and Edwards, G.E.**  
1177 (2001). Kranz anatomy is not essential for terrestrial C<sub>4</sub> plant photosynthesis. *Nature*  
1178 **414**: 543–546.
- 1179 **Wang, P., Khoshravesh, R., Karki, S., Tapia, R., Balahadia, C.P., Bandyopadhyay, A.,**  
1180 **Quick, W.P., Furbank, R., Sage, T.L., and Langdale, J.A.** (2017). Re-creation of a Key  
1181 Step in the Evolutionary Switch from C<sub>3</sub> to C<sub>4</sub> Leaf Anatomy. *Curr. Biol.* **27**: 3278-  
1182 3287.e6.
- 1183 **Waters, M.T., Moylan, E.C., and Langdale, J.A.** (2008). GLK transcription factors regulate  
1184 chloroplast development in a cell-autonomous manner. *Plant J.* **56**: 432–444.
- 1185 **Waters, M.T., Wang, P., Korkaric, M., Capper, R.G., Saunders, N.J., and Langdale, J.A.**  
1186 (2009). GLK Transcription Factors Coordinate Expression of the Photosynthetic  
1187 Apparatus in *Arabidopsis*. *Plant Cell* **21**: 1109–1128.
- 1188 **Wickham, H.** (2016). *ggplot2: Elegant Graphics for Data Analysis*.
- 1189 **Wigoda, N., Pasmanik-Chor, M., Yang, T., Yu, L., Moshelion, M., and Moran, N.** (2017).  
1190 Differential gene expression and transport functionality in the bundle sheath versus  
1191 mesophyll—a potential role in leaf mineral homeostasis. *J. Exp. Bot.* **68**: 3179–3190.
- 1192 **Williams, M.L., Farrar, J.F., and Pollock, C.J.** (1989). Cell specialization within the  
1193 parenchymatous bundle sheath of barley. *Plant, Cell Environ.* **12**: 909–918.
- 1194 **Yang, J., Gao, M., Hu, H., Ding, X., Lin, H., Wang, L., Xu, J., Mao, C., Zhao, F., and Wu,**  
1195 **Z.** (2016). OsCLT1, a CRT-like transporter 1, is required for glutathione homeostasis  
1196 and arsenic tolerance in rice. *New Phytol.* **211**: 658–670.
- 1197 **Yao, W., Li, G., Yu, Y., and Ouyang, Y.** (2018). funRiceGenes dataset for comprehensive  
1198 understanding and application of rice functional genes. *Gigascience* **7**: 1–9.
- 1199 **Yonekura-Sakakibara, K., Onda, Y., Ashikari, T., Tanaka, Y., Kusumi, T., and Hase, T.**  
1200 (2000). Analysis of reductant supply systems for ferredoxin-dependent sulfite reductase  
1201 in photosynthetic and nonphotosynthetic organs of maize. *Plant Physiol.* **122**: 887–894.
- 1202 **Yu, G.** (2020). Using *ggtree* to Visualize Data on Tree-Like Structures. *Curr. Protoc.*

1203 Bioinforma. **69**.

1204 **Zelazny, E., Borst, J.W., Muylaert, M., Batoko, H., Hemminga, M.A., and Chaumont, F.**

1205 (2007). FRET imaging in living maize cells reveals that plasma membrane aquaporins

1206 interact to regulate their subcellular localization. Proc. Natl. Acad. Sci. U. S. A. **104**:

1207 12359–12364.

1208 **Zhang, W., Wu, Y., Schnable, J.C., Zeng, Z., Freeling, M., Crawford, G.E., and Jiang, J.**

1209 (2012). High-resolution mapping of open chromatin in the rice genome. Genome Res.

1210 **22**: 151–162.

1211

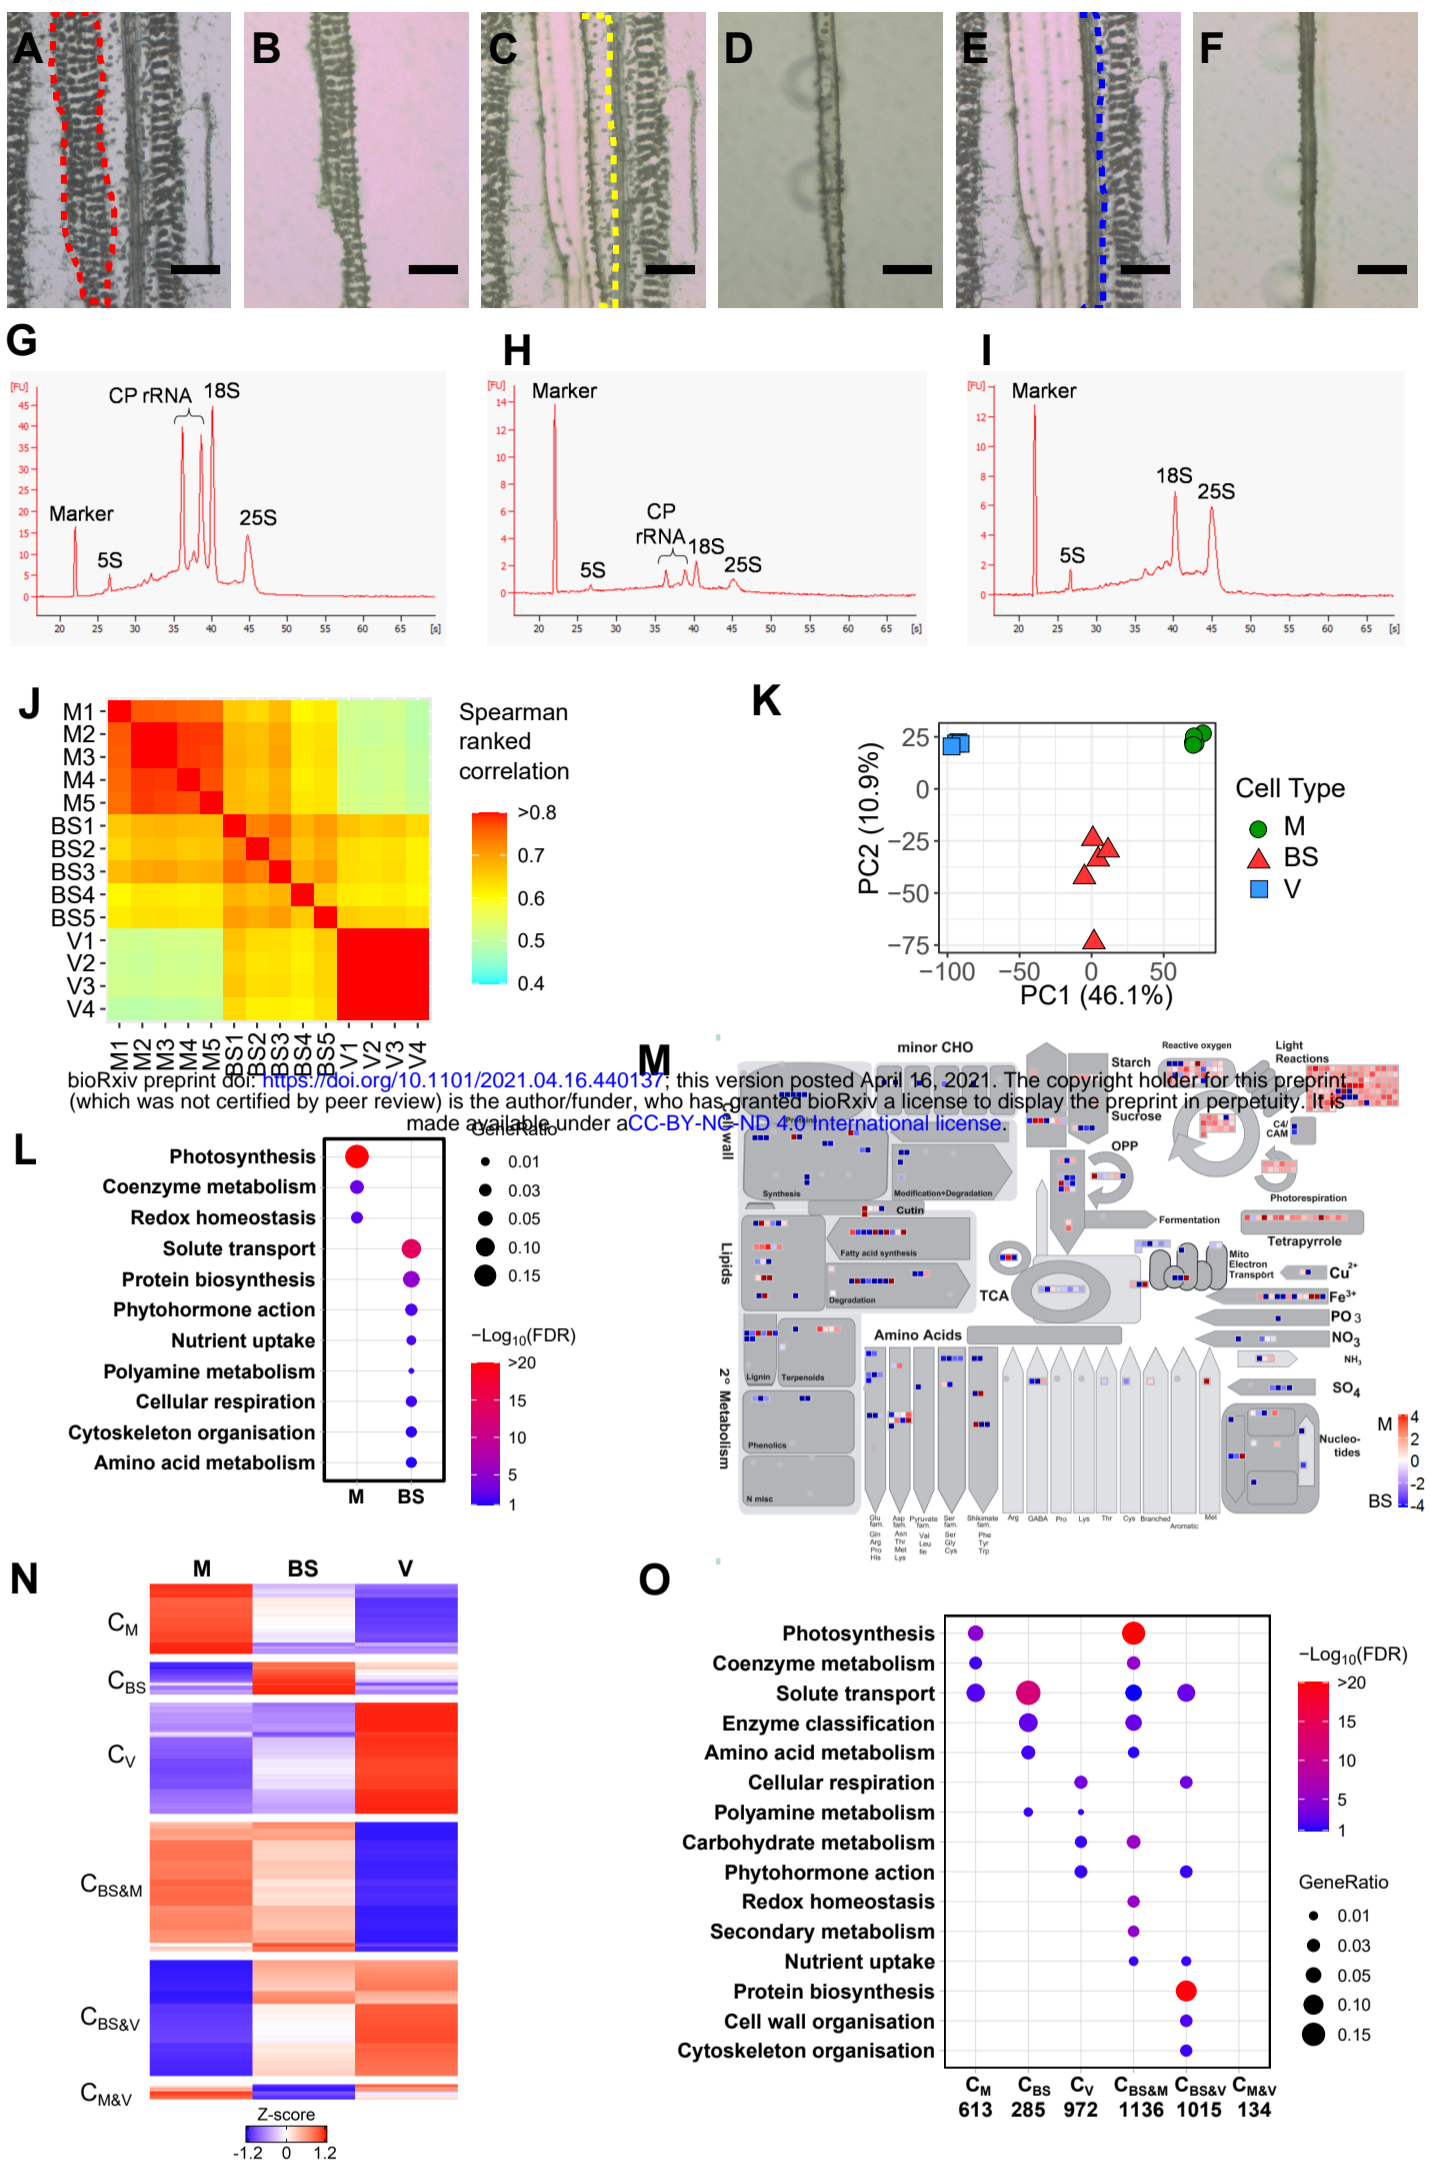

**Figure 1. RNA was isolated from mesophyll, bundle sheath and veinal cells of rice using laser capture microdissection.** Each cell-type was identified and then sequentially removed from paradermal sections prior to RNA quality being assessed. (A&B) Representative image of mesophyll cells outlined with red dash line (A) that are cut with a UV laser and then captured with an infrared laser and placed on a cap (B). (C&D) Bundle sheath cells (C) were then cut and captured (D). (E&F) Lastly, veinal cells (E) were cut and captured (F). Scale bars represents 50 microns. (G-I) Representative RNA profiles from microdissected mesophyll (G), bundle sheath (H) and veinal cells (I). Peaks from the cytosolic 25S, 18S and 5S ribosomal RNAs were detected in all cell types. Chloroplastic ribosomal RNAs (CP rRNA) were clearly detectable in mesophyll and bundle sheath cells. (J) Spearman ranked correlations of  $\log_2$  transformed TPM (transcripts per million) indicates little variation between biological replicates from each cell type, and distinct patterns of gene expression in each cell type. (K) Principal component analysis of normalised counts after variance-stabilizing transformation showing that cell type accounted for 46.1% of the variance detected in the data. (L) Primary Mapman categories associated with differentially expressed genes in bundle sheath and mesophyll cells. Terms were defined using Fisher's exact test (False discovery rate,  $FDR < 0.1$ ), colour scale represents negative  $\log_{10}$  transformed FDR, gene ratio represents the ratio of matched genes in categories relative to total number of differentially expressed genes in each cell type. (M) Metabolic overviews of differentially expressed genes between bundle sheath and mesophyll. Colour scale presents the  $\log_2$  fold change. (N) k-mean clustering of 4155 differentially expressed transcripts was performed using  $\log_2$  transformed quantile-normalized TPM (transcripts per million) and visualized in a heatmap. Clusters were named as  $C_M$ ,  $C_{BS}$ ,  $C_V$ ,  $C_{BS\&M}$ ,  $C_{BS\&V}$  and  $C_{M\&V}$ .  $C_M$  contained 613 genes that were strongest in mesophyll cells,  $C_{BS}$  contained 285 genes with preferential expression in bundle sheath cells,  $C_V$  contained 972 genes that were strongest in veins,  $C_{BS\&M}$  1136 genes mostly highly expressed in mesophyll and bundle sheath cells,  $C_{BS\&V}$  1015 genes that were preferential to bundle sheath and veinal cells, and  $C_{M\&V}$  134 genes strongly expressed in both mesophyll and veinal cells. Colour scale represents Z-score. (O) Schematic illustrating the enriched primary categories derived from Mapman using Fisher's exact test ( $FDR < 0.1$ ) for each of the six clusters, colour scale indicates negative  $\log_{10}$  transformed FDR, size of dots (GeneRatio) represents the ratio of matched genes in each category relative to total number of genes in each cluster.



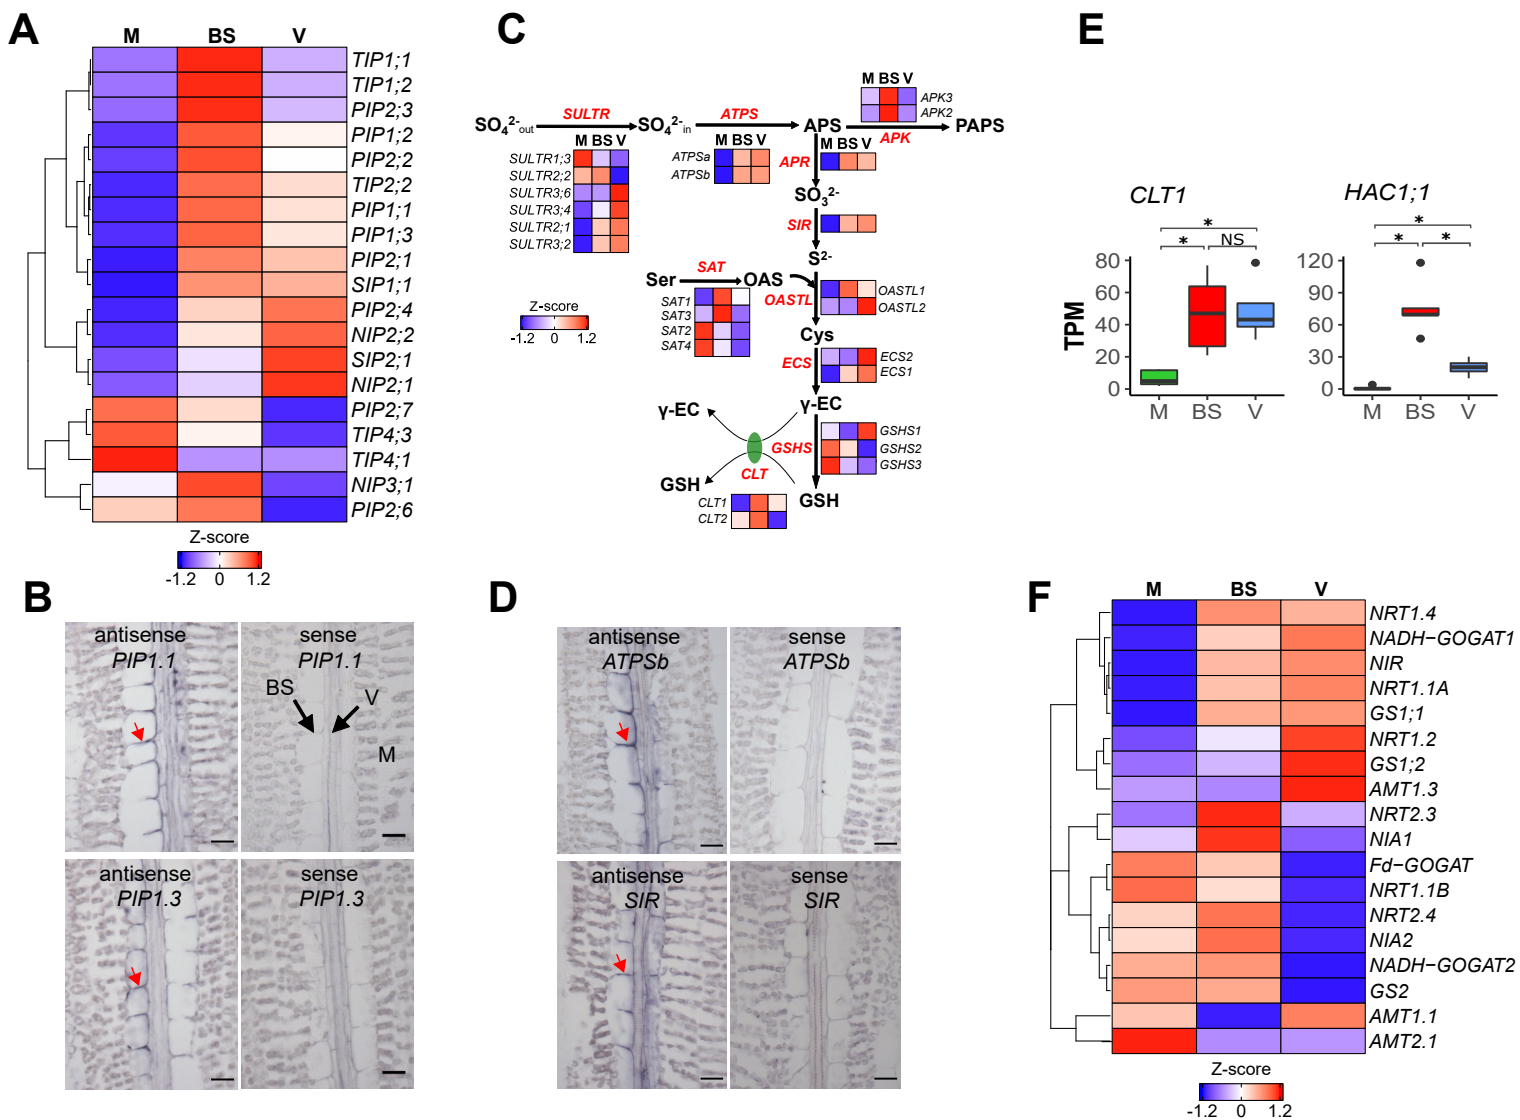

**Figure 2. Preferential accumulation of transcripts associated with water transport, sulphur and nitrogen assimilation in the rice bundle sheath.** (A) Relative transcript abundance for aquaporins in mesophyll, bundle sheath and veinal cells. Log<sub>2</sub> transformed quantile normalized TPM were scaled and genes with similar expression pattern were clustered using hierarchical method. (B) Representative image after *in situ* hybridization localization for *PIP1.1* and *PIP1.3* mRNAs, scale bars represent 20 microns, red arrows indicate specific signal on bundle sheath cell periphery. (C) Schematic illustrating sulphur assimilation and relative transcript abundance in mesophyll (M), bundle sheath (BS) and veinal (V) cells depicted as Z-score from log<sub>2</sub> transformed quantile normalized TPM. (D) Representative image after *in situ* hybridization for *ATPSb* and *SIR* mRNAs, scale bars represent 20 microns, red arrows indicate specific signal on bundle sheath cell periphery. (E) Transcript abundance of *CLT1* and *HAC1;1*. (F) Relative transcript abundance for genes involved in nitrogen assimilation.

Abbreviations for (A): PIP, plasma membrane intrinsic proteins; TIP, tonoplast intrinsic proteins; SIP, small basic intrinsic proteins; NIP, NOD26-like intrinsic proteins. Abbreviations for (C): SULTR, sulphate transporter; ATPS, ATP sulfurylase; APS, adenosine 5'-phosphosulfate; PAPS, 3'-phosphoadenosine 5'-phosphosulfate; APR, APS reductase; SIR, sulfite reductase; APK, APS kinase; SAT, serine acetyltransferase; OAS, O-acetylserine; OASTL, O-acetylserine (thiol)lyase;  $\gamma$ -ECS, glutamate-cysteine ligase;  $\gamma$ -EC,  $\gamma$ -glutamylcysteine; CLT, chloroquine-resistance transporter-like transporter; GS, glutamine synthetase; NADH-GOGAT, NADH-dependent glutamate synthase; Fd-GOGAT, ferredoxin-dependent glutamate synthase.

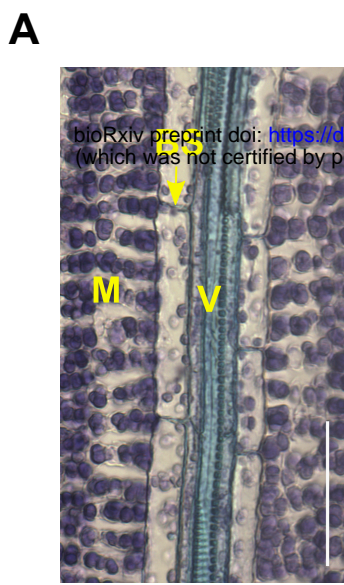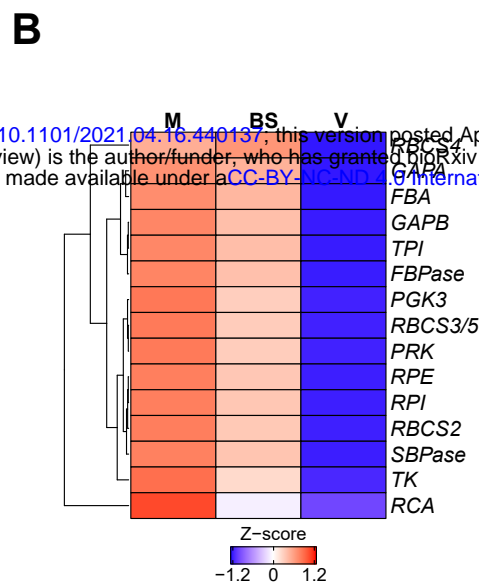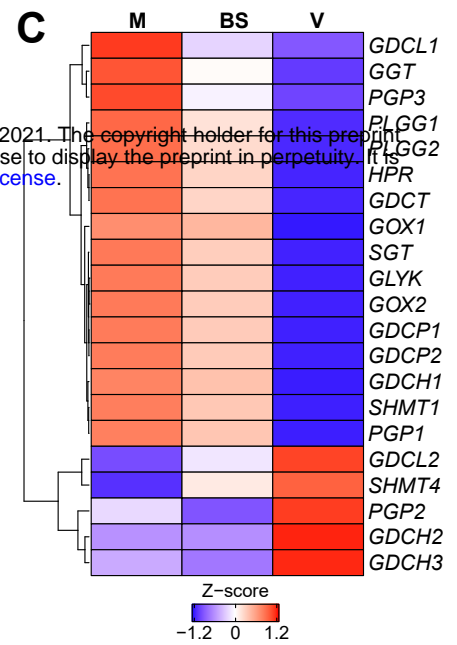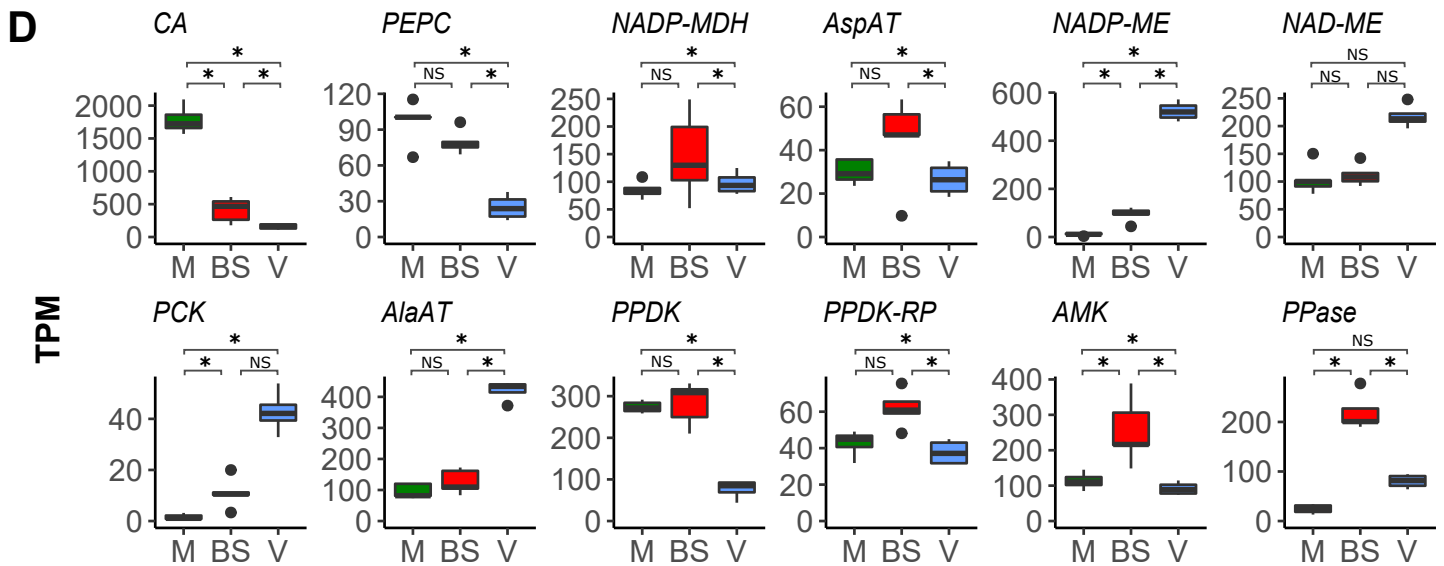

**Figure 3. Relative transcript abundance for genes involved in Calvin Benson Bassham cycle (B) and photorespiration (C) and C<sub>4</sub> pathway (D) in mesophyll (M), bundle sheath (BS) and veinal (V) cells of rice.** (A) Paradermal section of rice leaf stained with toluidine blue shows bundle sheath cells are less occupied by chloroplasts compared with mesophyll cells, scale bar represents 50 microns. (B&C) Transcripts associated with Calvin Benson Bassham cycle (B) and photorespiration (C) were preferentially expressed in mesophyll cells, log<sub>2</sub> transformed quantile normalized TPM were scaled and genes with similar expression pattern were clustered using hierarchical method. (D) Transcripts encoding the C<sub>4</sub> acid decarboxylases NADP-DEPENDENT MALIC ENZYME (NADP-ME) and PHOSPHOENOLPYRUVATE CARBOXYKINASE (PCK) accumulated preferentially in bundle sheath and veinal cells whilst ancillary enzymes AMP KINASE (AMK) and PYROPHOSPHORYLASE (PPASE) for PYRUVATE, ORTHOPHOSPHATE DIKINASE (PPDK) accumulated preferentially in bundle sheath cells, data are presented as TPM (transcript per million), asterisks indicate statistically significant difference (FDR and adjusted P < 0.05 using edgeR and DESeq2 analysis).

Abbreviations in (B): PGK, phosphoglycerate kinase; GAP/A/B, glyceraldehyde-3-phosphate dehydrogenase; TPI, triose-phosphate isomerase; FBA, fructose-1,6-bisphosphate aldolase, FBPase, fructose-1,6-bisphosphatase; TK, transketolase; SBPase, sedoheptulose 1,7-bisphosphatase; RPI, phosphopentose isomerase; RPE, phosphopentose epimerase; PRK, phosphoribulokinase; RBCS, RuBisCO small subunit; RCA, RuBisCO activase. Abbreviations in (C): PGP, phosphoglycolate phosphatase; GOX, glycolate oxidase; GGT, glutamate:glyoxylate aminotransferase; GDC, glycine decarboxylase; SHMT, serine hydroxymethyltransferase; SGT, serine:glyoxylate aminotransferase; HPR, hydroxypyruvate reductase; GLYK, glycerate kinase. Abbreviations in (D): CA, carbonic anhydrase; PEPC, phosphoenolpyruvate carboxylase; NADP-MDH, NADP-dependent malic dehydrogenase; AspAT, aspartate aminotransferase; NADP-ME, NADP-dependent malic enzyme; NAD-ME, NAD-dependent malic enzyme; PCK, phosphoenolpyruvate carboxykinase; AlaAT, alanine aminotransferase; PPDK, pyruvate, orthophosphate dikinase; PPDK-RP, regulatory protein of PPDK; AMK, AMP kinase; PPase, pyrophosphorylase.



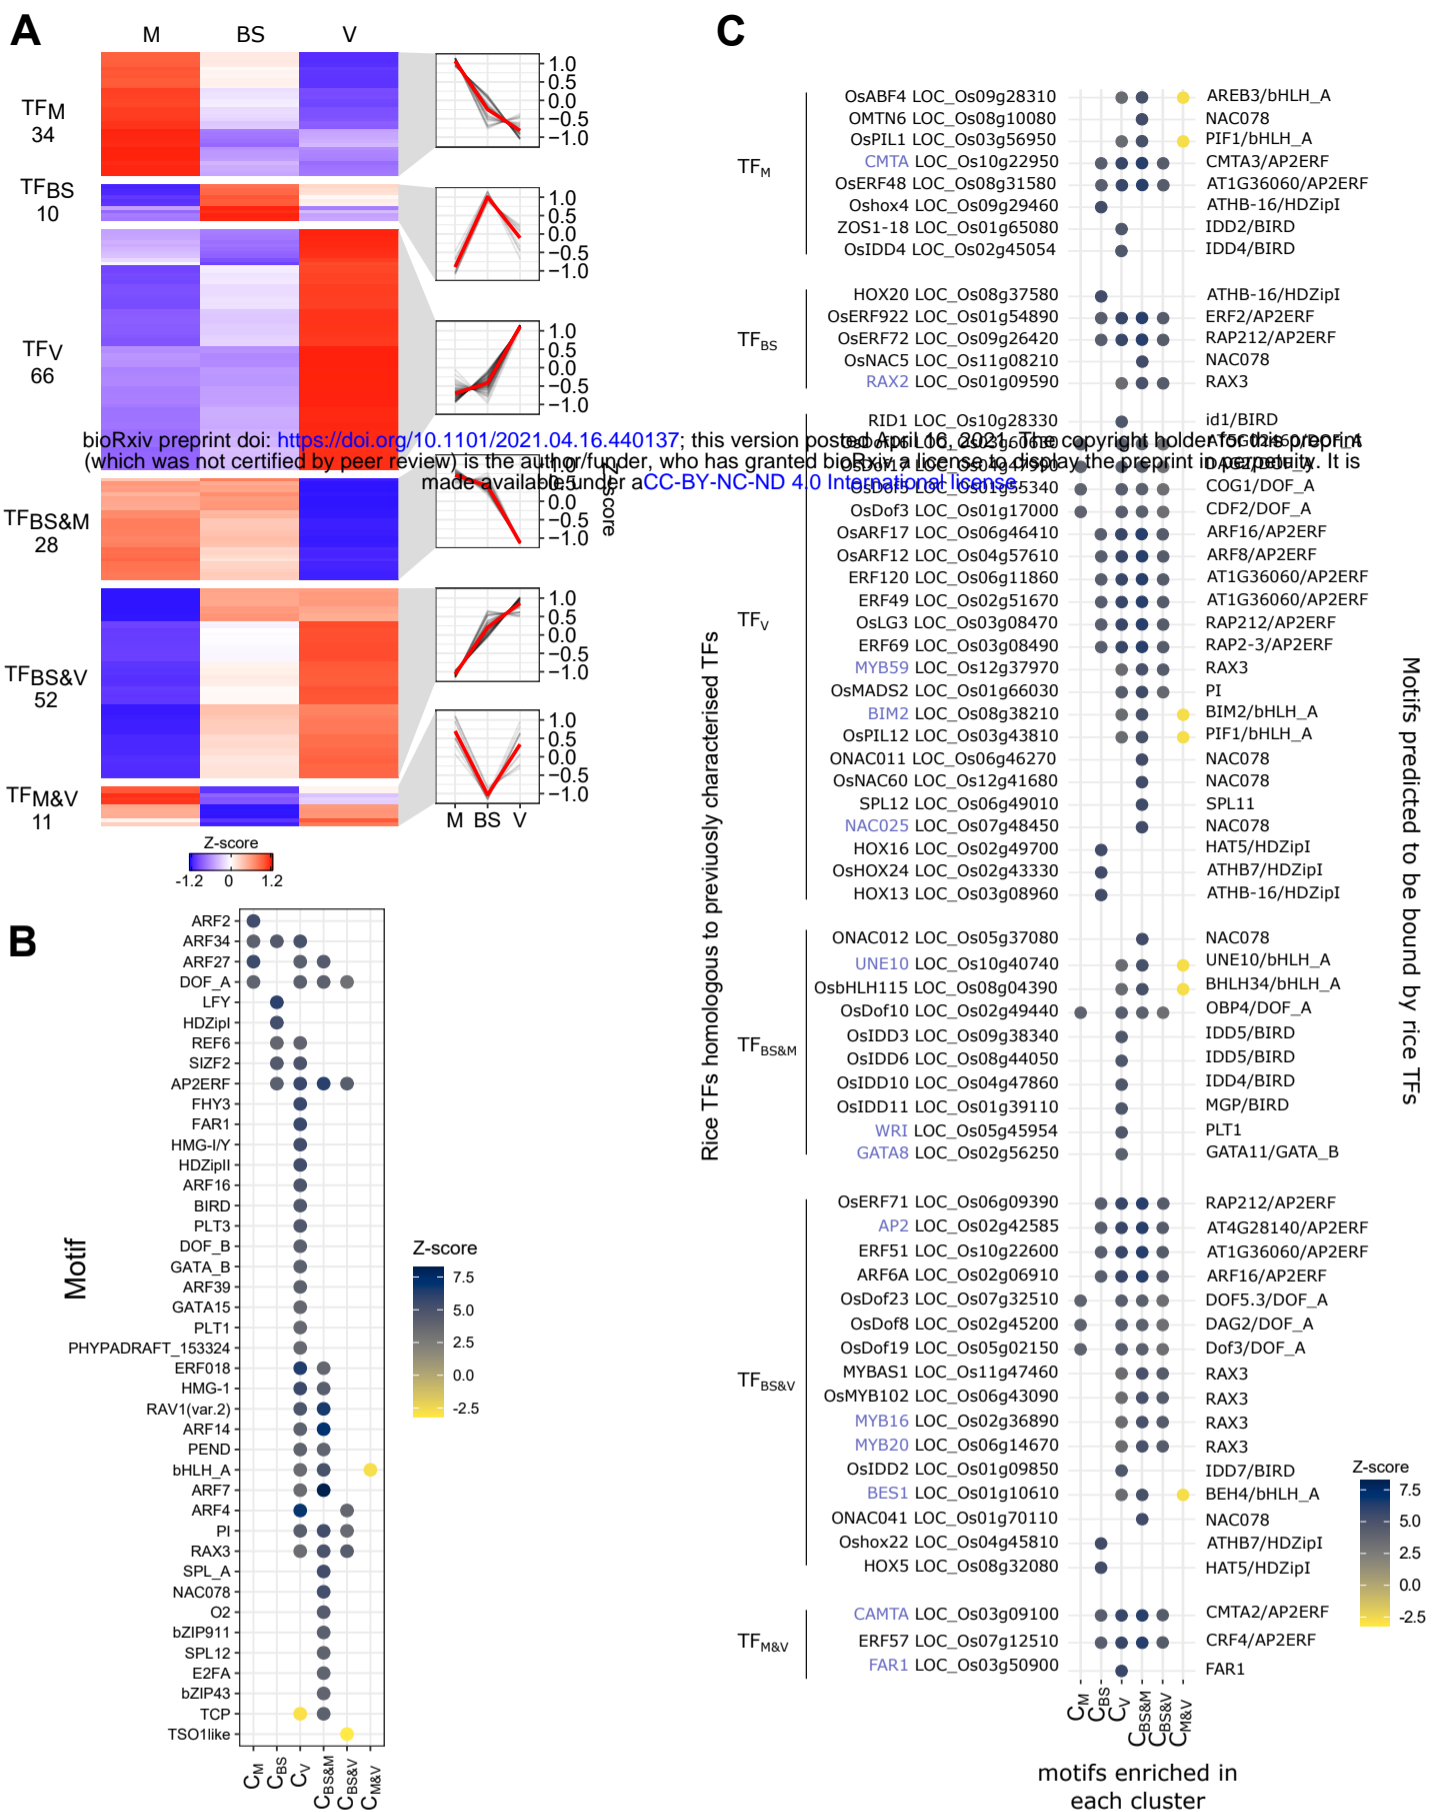

**Figure 4 Patterning of transcription factors between mesophyll, bundle sheath and veinal cells of rice.** (A) Transcription factors from cluster  $C_M$ ,  $C_{BS}$ ,  $C_V$ ,  $C_{BS\&M}$ ,  $C_{BS\&V}$  and  $C_{M\&V}$  were designated as  $TF_M$ ,  $TF_{BS}$ ,  $TF_V$ ,  $TF_{BS\&M}$ ,  $TF_{BS\&V}$  and  $TF_{M\&V}$  respectively, relative abundance of differentially expressed transcription factors were presented as heatmap and line plot of Z-score which is calculated from  $\log_2$  transformed quantile normalized TPM, red lines in line plot represent mean of Z-score. (B) Significantly enriched or depleted motifs were identified in each of the six gene expression clusters, enrichment was calculated using the regioneR permutation testing package (Gel et al., 2016) following motif scanning using FIMO to identify motifs from the plant Jaspar non-redundant database (Fornes et al., 2020). The Z-scores are shown with a colour scale to show the magnitude of enrichment (dark blue) or depletion (yellow) for motifs that were significant after multiple testing correction. Motifs derived from closely related TFs were grouped together for visualisation based on their degree of overlap to predicted target sites (e.g. AP2ERFs). The cistrome from cluster  $C_V$  shows the greatest number of enriched motifs, including 13 uniquely enriched, while the  $C_M$  and  $C_{BS}$  cistromes have far fewer. (C) Cluster specific TFs (left of panel) were mapped to motifs (right of panel) they would be most likely to bind based on high protein sequence similarity with the proteins in the Jaspar plant motif database. The TFs that mapped to any enriched motifs are shown with the motif enrichment data. This allows visualisation of the intersection between TF transcript abundance with potential activation activity. Gene symbols of rice transcription factors were retrieved from funRiceGene database (Yao et al., 2018) but for the symbols not found in the database, symbols of best hit Arabidopsis transcription factors were used and presented in blue. The matching motifs show first the best match and then the motif group if part of a group as shown in 4B.

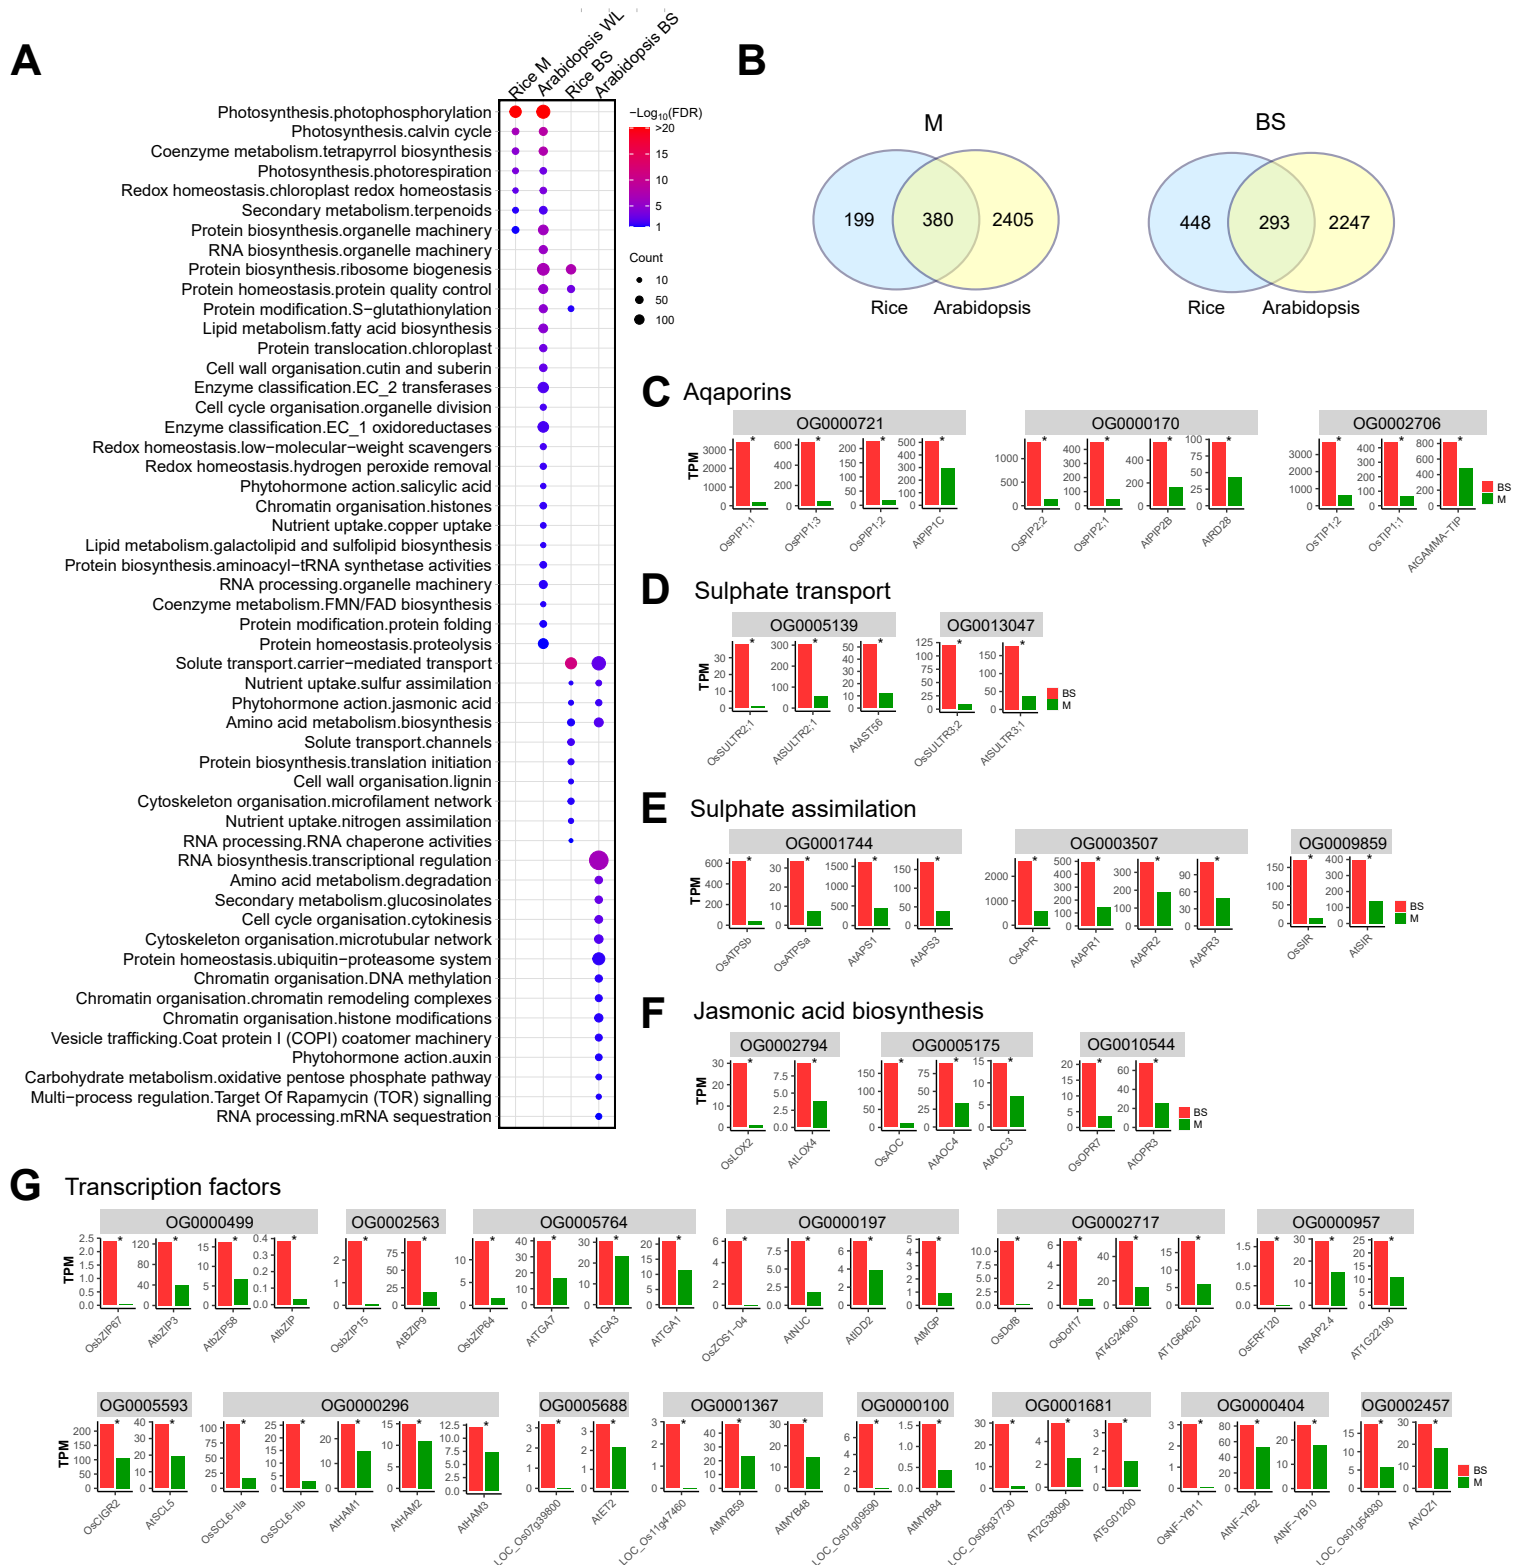

**Figure 5. Conserved patterning of gene expression in the Arabidopsis and rice bundle sheath.** Orthologs from Arabidopsis and rice associated with aquaporins, sulphate transport and assimilation as well as jasmonic acid biosynthesis are strongly expressed in bundle sheath cells. (A) The enriched Mapman categories (secondary level) of BS and M preferential genes in rice and Arabidopsis were defined using Fisher's exact test ( $FDR < 0.1$ ). (B) Venn diagram illustrating the extent to which genes in the same orthogroup are preferentially expressed in mesophyll or bundle sheath cells of both rice and Arabidopsis. (C-G) Transcript abundance of Arabidopsis and rice genes belonging to the same orthogroups of aquaporins (C), sulphate transport (D), sulphate assimilation (E), jasmonic acid biosynthesis (F), and transcription factors (G). Data are presented as TPM and statistically significant differences annotated with an asterisk ( $FDR$  and adjusted  $P < 0.05$  using edgeR and DESeq2 analysis in this study, PPDE  $> 0.95$  in Aubry et al., 2014b), red and green bars represent bundle sheath and mesophyll respectively.
